1 **Title**

2 **Discovery of photosynthesis genes through whole-genome sequencing of acetate-**  
3 **requiring mutants of *Chlamydomonas reinhardtii***

4

5 Setsuko Wakao<sup>1,2\*</sup>, Patrick M. Shih<sup>3,4</sup>, Katharine Guan<sup>2,5</sup>, Wendy Schackwitz<sup>6</sup>, Joshua  
6 Ye<sup>2,5</sup>, Robert M. Shih<sup>1</sup>, Mansi Chovatia<sup>6</sup>, Aditi Sharma<sup>6</sup>, Joel Martin<sup>6</sup>, Chia-Lin Wei<sup>6§</sup>,  
7 Krishna K. Niyogi<sup>1,2,5\*</sup>

8

9 Affiliations:

10 <sup>1</sup>Division of Molecular Biophysics and Integrated Bioimaging, Lawrence Berkeley  
11 National Laboratory, Berkeley, CA 94720, USA

12 <sup>2</sup>Department of Plant and Microbial Biology, University of California, Berkeley, CA  
13 94720, USA

14 <sup>3</sup>Department of Plant Biology, University of California, Davis, CA 95616, USA.

15 <sup>4</sup>Joint BioEnergy Institute, Emeryville, CA 94608, USA

16 <sup>5</sup>Howard Hughes Medical Institute, University of California, Berkeley, CA 94720, USA

17 <sup>6</sup>Joint Genome Institute, Lawrence Berkeley National Laboratory, CA 94720, USA

18 <sup>§</sup>Present address: Jackson Lab, Farmington CT, 06032

19 <sup>\*</sup>For correspondence: [swakao@berkeley.edu](mailto:swakao@berkeley.edu) and [niyogi@berkeley.edu](mailto:niyogi@berkeley.edu)

20

## 21 **Abstract**

22 Large-scale mutant libraries have been indispensable for genetic studies, and the  
23 development of next-generation genome sequencing technologies has greatly advanced  
24 efforts to analyze mutants. In this work, we sequenced the genomes of 660  
25 *Chlamydomonas reinhardtii* acetate-requiring mutants, part of a larger photosynthesis  
26 mutant collection previously generated by insertional mutagenesis with a linearized  
27 plasmid. We identified 554 insertion events from 509 mutants by mapping the plasmid  
28 insertion sites through paired-end sequences, in which one end aligned to the plasmid and  
29 the other to a chromosomal location. Nearly all (96%) of the events were associated with  
30 deletions, duplications, or more complex rearrangements of genomic DNA at the sites of  
31 plasmid insertion, and 1405 genes in total were affected. Functional annotations of these  
32 genes were enriched in those related to photosynthesis, signaling, and tetrapyrrole  
33 synthesis as would be expected from a library enriched for photosynthesis mutants.  
34 Systematic manual analysis of the disrupted genes for each mutant generated a list of 273  
35 higher-confidence candidate photosynthesis genes, and we experimentally validated two  
36 genes that are essential for photoautotrophic growth, *CrLPA3* and *CrPSBP4*. The  
37 inventory of candidate genes includes 55 genes from a phylogenomically defined set of  
38 conserved genes in green algae and plants. Altogether, 68 candidate genes encode  
39 proteins with previously characterized functions in photosynthesis in *Chlamydomonas*,  
40 land plants, and/or cyanobacteria, 15 genes encode proteins previously shown to have  
41 functions unrelated to photosynthesis, and 190 genes encode proteins without any  
42 functional annotation, signifying that our results connect a function related to  
43 photosynthesis to these previously unknown proteins. This mutant library, with genome

44 sequences that reveal the molecular extent of the chromosomal lesions and resulting  
45 higher-confidence candidate genes, represents a rich resource for gene discovery and  
46 protein functional analysis in photosynthesis.

47

## 48 **Introduction**

49 Since the dawn of modern genetics, mutagenesis has been the primary vehicle to perturb  
50 the underlying genetic code of organisms, enabling scientists to investigate the genetic  
51 determinants underpinning biological systems. In the case of photosynthesis, much has  
52 been learned through mutagenesis of the unicellular green alga, *Chlamydomonas*  
53 *reinhardtii*, which has proven to be an indispensable reference organism for investigating  
54 the molecular components, regulation, and overall processes of photosynthesis (1,2).  
55 *Chlamydomonas* has a haploid genome and an ability to use acetate as a sole carbon  
56 source, which facilitates the isolation and analysis of knock-out mutants that are defective  
57 in photosynthesis (3). Moreover, the advantage of working with a unicellular alga rather  
58 than a whole plant has facilitated the speed with which molecular and genetic studies can  
59 be carried out (4). Thus, the development of resources and tools to increase the breadth  
60 and depth of genetic studies in *Chlamydomonas* has advanced our ability to understand  
61 the molecular basis of photosynthesis.

62 Numerous large-scale mutagenesis and screening experiments have been carried out  
63 in *Chlamydomonas*, with some of the earliest efforts described over half a century ago  
64 (3,5,6). Classical mutagenesis studies have utilized chemical and physical mutagens,  
65 which induce untargeted genomic lesions and rearrangements across the genome.  
66 Identifying the causative mutations requires genetic mapping through crosses, an

67 approach that is robust but time consuming. Insertional mutagenesis approaches, in which  
68 a selectable marker is transformed and randomly integrated into the genome, have  
69 facilitated molecular analysis, and many PCR-based techniques have been successfully  
70 employed in *Chlamydomonas* to rapidly identify flanking sequence tags (FSTs) from the  
71 site of marker insertion (7–14). However, the efficiency of FST recovery can be low (7)  
72 because of the complexity of events accompanying plasmid insertion such as  
73 concatemerization, chromosomal deletion or rearrangement, loss of the primer annealing  
74 sites, as well as difficulties with PCR from the *Chlamydomonas* nuclear genome, which  
75 is GC-rich and contains a high degree of repetitive sequences (15). High-throughput FST  
76 recovery has been achieved in *Chlamydomonas* (8,10) and has offered a large collection  
77 of insertional mutants for the scientific community while enabling large-scale mutant  
78 analysis of photoautotrophic growth (9).

79 The advent of next-generation sequencing methods has dramatically improved our  
80 ability to identify mutations by whole-genome sequencing (WGS). In *Chlamydomonas*,  
81 this approach was initially combined with linkage mapping to identify point mutations in  
82 flagellar mutants (11,12), and it was used subsequently for point mutations affecting the  
83 cell cycle (13,14) and light signaling (16,17). In the case of insertional mutants, WGS has  
84 been used extensively to identify insertion sites in bacteria and some microbial  
85 eukaryotes with smaller genomes (18–20) but only for a relatively small number of  
86 mutants in *Chlamydomonas* (21). In maize, due to its large genome, high-throughput  
87 next-generation sequencing of *Mu* transposon insertion sites has been applied only after  
88 enrichment for the transposon sequence (22), whereas the large volume of insertion site

89 information of T-DNA insertion lines in *Arabidopsis* was obtained from traditional PCR-  
90 based FST isolation (23–25).

91 We have previously generated a large insertional mutant population of  
92 *Chlamydomonas* by transformation with a linearized plasmid conferring paromomycin or  
93 zeocin resistance, and we identified mutants with photosynthetic defects (*i.e.*, acetate-  
94 requiring and/or light-sensitive and reactive oxygen species-sensitive mutants) (7,26).  
95 However, we were only able to obtain FSTs for 17% of the mutants using PCR-based  
96 approaches. Here we employed low-coverage WGS of a subset of 660 mutants to identify  
97 the plasmid insertion sites and accompanying structural variants, and we found 1405  
98 genes that are affected by the plasmid insertion in 509 mutants. We generated a list of  
99 273 genes from 348 mutants that we refer to as higher-confidence causative genes,  
100 enabling the discovery of 205 potential photosynthesis genes; 190 genes of previously  
101 unknown function and 15 genes previously shown to have functions unrelated to  
102 photosynthesis. We experimentally validated two genes, *CrLPA3* and *CrPSBP4*, that are  
103 required for photoautotrophic growth in *Chlamydomonas*. In addition, our data provide  
104 insight into the spectrum of mutations that are induced by insertional mutagenesis in  
105 *Chlamydomonas*.

106

## 107 **Results**

### 108 **Identification of insertion sites by mapping of discordant read pairs**

109 We re-screened our *Chlamydomonas* photosynthetic mutant collection (7,26) for growth  
110 on minimal and acetate-containing media under three light conditions (dark, D; low light  
111 of 60-80  $\mu\text{mol photons m}^{-2} \text{s}^{-1}$ , LL; and high light of 350-400  $\mu\text{mol photons m}^{-2} \text{s}^{-1}$ , HL)

112 and for maximum photochemical efficiency of photosystem (PS) II ( $F_v/F_m$ ) (S1 Table).  
113 An example of the phenotyping is shown in Figure 1. A total of 660 mutants, most of  
114 them with a growth phenotype and with resistance to either zeocin or paromomycin,  
115 indicative of the presence of the linearized plasmid sequence used for insertional  
116 mutagenesis, were chosen for WGS and herein will be referred to as the Acetate-  
117 Requiring Collection (ARC).

118 Genomic DNA was extracted from the 660 ARC mutants and submitted for low-  
119 coverage, paired-end WGS with a target depth of sequence coverage for each mutant  
120 between 5 and 10. The average sequencing depth across samples was 7.44. Paired-end  
121 reads that showed one end mapping to the plasmid used for mutagenesis and the other to  
122 a chromosome location were used to identify the plasmid insertion site(s) in each mutant.  
123 Plasmid insertion sites were not identified for 72 mutants, because few plasmid sequence  
124 reads were detected or the other end mapped to a low complexity region of the  
125 *Chlamydomonas* genome. 79 mutants had insertions that were not unique within the  
126 population (33 were duplicated, three were triplicated and one was quadruplicated) and  
127 were removed from further analysis. The remaining 509 mutant sequences were further  
128 analyzed for structural variants (insertions, deletions, and rearrangements) that occurred  
129 during insertional mutagenesis.

130 Figure 2 illustrates the types of structural variants detected by analysis of the  
131 paired-end sequence data. Most sequence read pairs were concordant, i.e., they showed  
132 the expected orientation and distance with respect to each other when mapped to the  
133 *Chlamydomonas* genome (Figure 2, dark gray arrows). In contrast, discordant pairs  
134 showed the incorrect orientation or distances that were closer or further from each other

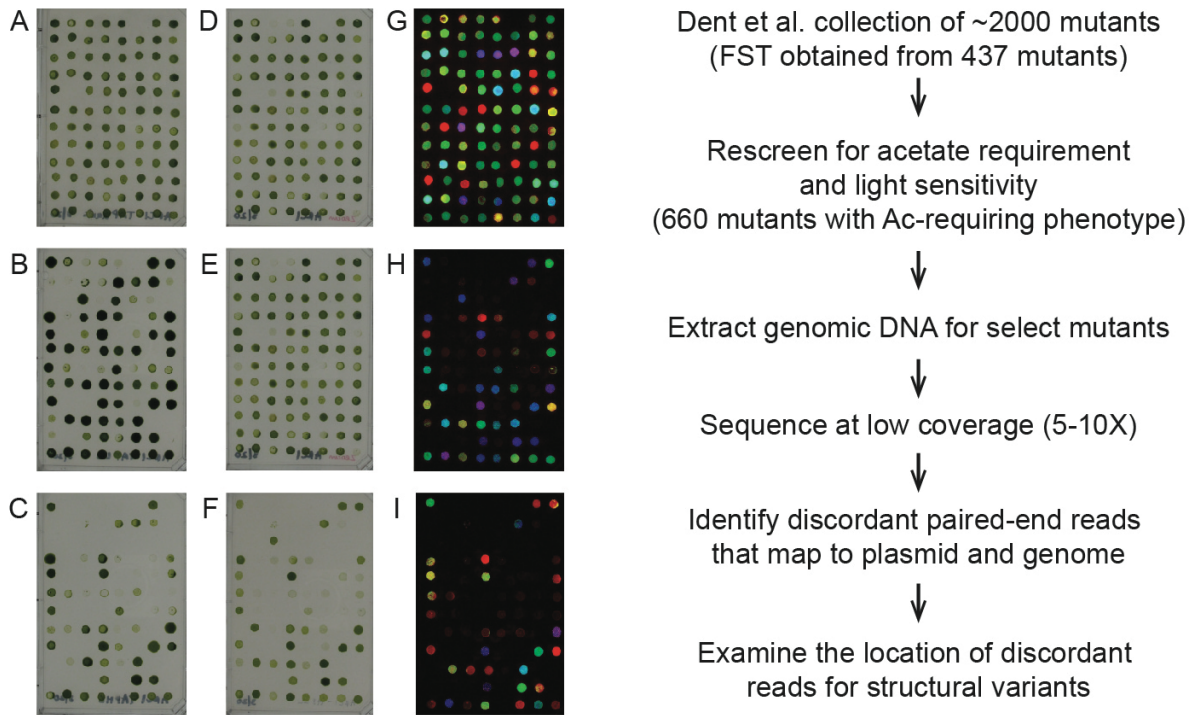

Fig 1. Growth and chlorophyll fluorescence screen pipeline.

Mutants were scored for growth on (A) D+ac, (B) LL+ac, (C) HL+ac, (D) LL+ac+zeocin, (E) LL-min, (F) HL-min. Fv/Fm values were measured on cells grown on (G) D+ac, (H) LL-min, (I) HL-min. FST, flanking sequence tag. A representative plate spotted from a 96-well plate is shown. D, dark; LL, low light; HL, high light; +ac, added acetate; min, minimal media.

135 than expected based on the genome fragmentation that was performed during sequencing  
136 library preparation (genomic DNA was sheared to approximately 600 bp) or on different  
137 chromosomes. In Figure 2, the discordant reads are shown as colored arrows, with each  
138 color representing a chromosome (or plasmid) to which the corresponding paired-end  
139 read was mapped. Each of these genomic sites where sequence read pairs were discordant  
140 is listed in S1 Table as a “Discordant site”.

141 At most of the plasmid insertion sites, two sets of discordant read pairs were found,  
142 with their chromosomal reads oriented toward each other and their paired-end reads  
143 mapping to the plasmid sequence (Figure 2 blue box). We refer to these 425 events as  
144 two-sided insertions, where both sides of the plasmid insertion were unambiguously  
145 mapped (S1 Table, column “Number of sides paired with plasmid at site”, 2). Another  
146 large group of discordant sites displayed only one set of discordant read pairs located on  
147 one side of the plasmid insertion (referred to as one-sided insertions Figure 2; S1 Table,  
148 column “Number of sides paired with plasmid at site”, 1). The read-pairs on the other  
149 side of the plasmid insertion could not be mapped in 21 of these insertion sites because (i)  
150 it was at a repetitive region (14 mutants) and (ii) it had no discordant reads (7 mutants).  
151 These 21 one-sided insertions together with the 425 two-sided insertions making a total  
152 of 446 insertions and were considered to be simple insertions (S1 Table). In the rest of  
153 the one-sided insertions, the other side of the plasmid insertion paired with another  
154 chromosomal region indicating an occurrence of a more complex chromosomal  
155 rearrangement. Insertions that paired with another chromosomal location was considered  
156 a complex insertion. The frequencies of two-sided, one-sided, and complex insertions are  
157 shown in S1 Figure.



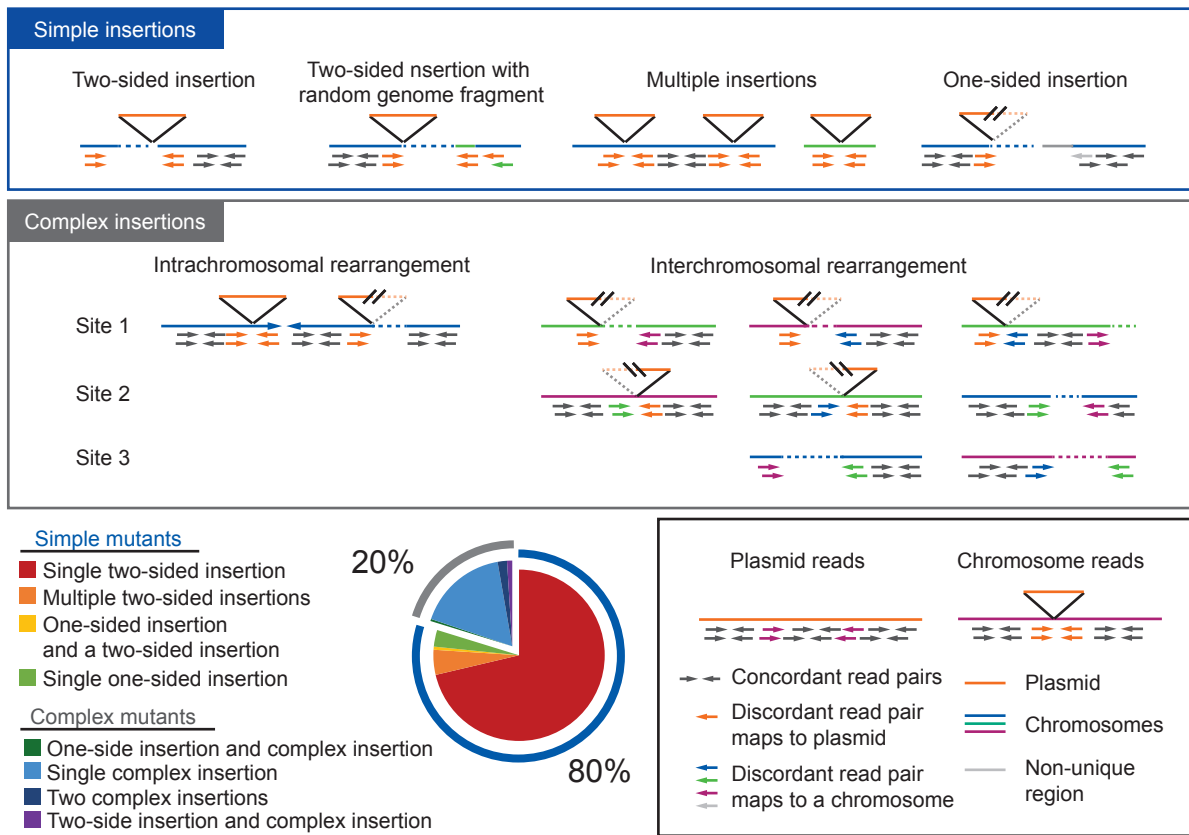

Fig 2. Examples of structural variations and the frequency mutants with simple or complex insertions in ARC. Boxes contain illustration examples of mapped reads as seen in IGV. Black box, mapped reads (concordant and discordant) against plasmid and chromosome. Blue box, examples of “Simple insertions”; Gray box, examples of “Complex insertions”. Gray box shows examples of different complex insertions that are intra- or interchromosomal rearrangements. Second from left in gray box shows a possible translocation between two chromosomes. Pie chart shows frequency of “Simple mutants” containing only Simple insertions and “Complex mutants” containing complex insertions.

158           A total of 406 mutants (80%) contained only simple insertions accounting for 435  
159 out of the total 446 simple insertions (11 mutants contained both simple and complex  
160 insertions) (Figure 2, Simple mutants). Among these 406 mutants, 24 mutants had  
161 multiple (two or three) two-sided insertions accounting for 50 insertions, and three  
162 mutants had one two-sided insertion and one one-sided insertion (Figure 2, S1 Figure). In  
163 17 mutants, the multiple simple insertions occurred on the same chromosome, and six of  
164 these had tandem two-sided insertions that disrupted the same or neighboring genes. In  
165 10 two-sided insertions (~1.8%), there appeared to be a short random fragment of another  
166 chromosome inserted together with the plasmid (Figure 2, Two-sided insertion with  
167 random genome fragment). The original locus of these random fragments did not show a  
168 lack of mapped sequence reads but rather showed double the abundance of reads  
169 mapping to the small region, indicating that it was an extra copy of the same sequence at  
170 the insertion site, similar to what was observed in a previous study but at a lower  
171 frequency in ARC (8).

172           The other group of 103 mutants (20%) contained at least one complex insertion  
173 (Figure 2 “Complex mutants”; also see S1 Table, “Pairing with other discordant site(s) of  
174 the same mutant”). Nine of these mutants had a coexisting two-sided insertion, two  
175 mutants had an additional one-sided insertion, and five mutants contained two  
176 independent complex insertions. Some of these rearrangements occurred on a single  
177 chromosome, and others involved two or more chromosomes (Figure 2, gray box).  
178 Among interchromosomal rearrangements, 13 of them involved two one-sided insertions  
179 that were paired to each other (Figure 2 gray box). These together may represent  
180 chromosomal translocation events resulting in two chimera chromosomes. In all of these

Complex insertions (108)

Mutants with

- One-side and complex (2)
- Single complex (87)
- Two-sided and complex (9)

One-sided insertions (21)

Mutants with

- Single one-sided (16)
- One-sided + complex (2)
- Two- and one-sided (3)

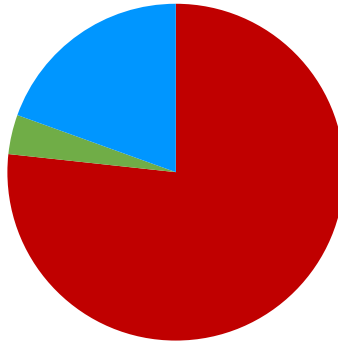

Two-sided insertions (425)

Mutants with

- Single two-sided (363)
- Multiple two-sided (50)
- Two- + one-sided (3)
- Two-sided and complex (9)

S1 Fig. Proportion of different types of insertions observed in ARC.

The frequency of the different types of insertions. Some insertions coexist with another insertion in a mutant. The number of mutants grouped by the types of insertions it contains is listed along with the number of insertions accounted for in that group.

181 possible translocation events, the plasmid sequence was present in one junction and not in  
182 the other. The proportion of complex insertion events was similar among the three  
183 plasmids used for transformation (pSP124S, pMS188, and pBC1). Validation of these  
184 complex structural variants would require *de novo* assembly of sequencing reads. Most  
185 mutants only contained only two-sided or only complex insertions; 387 mutants (76%)  
186 had only two-sided insertion(s) (Figure 2, red and orange slices), 92 had only complex  
187 insertion(s) (18%) (Figure 2, light blue slice), and only a small proportion of mutants  
188 contained a mix of two-sided, one-sided, or complex insertions.

189 In summary, low-coverage WGS data for 509 ARC mutants identified 406 mutants  
190 that contained only simple insertions accounting for 435 out of 446 total simple  
191 insertions, whereas 103 mutants contained complex insertions that were associated with  
192 chromosomal rearrangements such as inversions and translocations.

193

#### 194 **Analysis of deletions and duplications associated with insertional mutagenesis**

195 Insertional mutagenesis in *Chlamydomonas* has been previously associated with deletions  
196 and duplications at the site of plasmid insertion, especially when using glass bead for  
197 transformation (e.g. *cpld38*, *cpld49*, *npq4*, *rbdl1*) (27–29). Focusing on the 425 two-sided  
198 insertions, we found deletions associated with 374 insertions (88%). A wide range of  
199 deletion sizes was observed, with a bimodal distribution peaking at 101-1000 bp and 10 -  
200 100 kb when plotted at log<sub>10</sub>-scale, the largest deletion being 133 kb (Figure 3A).

201 Duplications occurred less frequently (7%), in a total of 29 insertion events (Figure 3B),  
202 and all were less than 1000 bp. Perfect insertions lacking any duplications or deletions  
203 were found in only 22 events (5%). Despite the high frequency and relatively large size

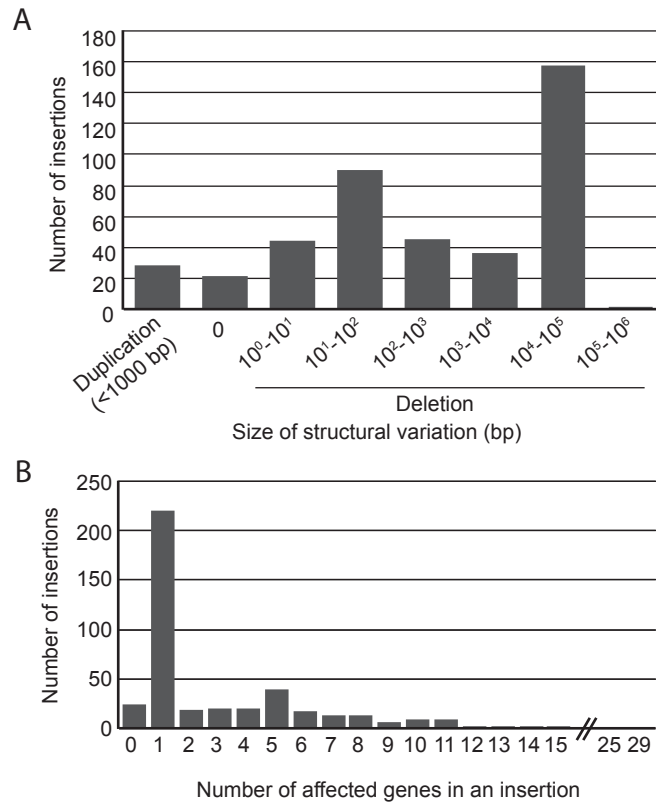

Fig 3. Structural variation accompanying insertions. (A) Duplication and deletion sizes and (B) number of mutants grouped by the number of genes affected by two-sided insertions. Only two-sided insertions were included in this analysis.

204 of many deletions, more than half (220 insertions) of the entire set of 425 two-sided  
205 insertions affected only a single gene (Figure 3C).

206

### 207 **Genetic linkage between acetate-requiring phenotype and antibiotic resistance**

208 To determine if the phenotype of ARC mutants was likely caused by the plasmid  
209 insertion, we back-crossed 89 mutants to the wild type (WT) and analyzed the genetic  
210 linkage of the acetate-requiring phenotype and antibiotic (paromomycin) resistance in the  
211 respective progenies. The acetate-requiring phenotype was closely linked to the antibiotic  
212 resistance in 88% (77 out of 88 that produced viable zygospores) of mutants that were  
213 tested (S1 Table, column “Genetic Linkage”). In each cross, approximately 100  
214 zygospores were collected and tested for recombination between the acetate-requiring  
215 phenotype and paromomycin resistance by selecting for progeny that were able to grow  
216 on minimal medium with paromomycin (S2 Figure). The lack of recombination and  
217 therefore growth indicates that the genetic distance between the mutation causing the  
218 acetate-requiring phenotype and paromomycin resistance is less than 0.5 cM, estimated to  
219 be 50 kb on average in the *Chlamydomonas* genome (15).

220

### 221 **Identification of secondary mutations using WGS data**

222 In addition to the deletions associated with plasmid insertions in the ARC mutants, we  
223 searched for and found 68 other deletions using Pindel (30) (S2 Table). The size of the  
224 deletions ranged from 20 bp to 36 kb, with a majority of them (55 deletions) being less  
225 than 100 bp (S2 Table). The deletions were visually confirmed on alignments as direct  
226 gaps in reads and/or the lack of reads within the region, depending on the size. This was

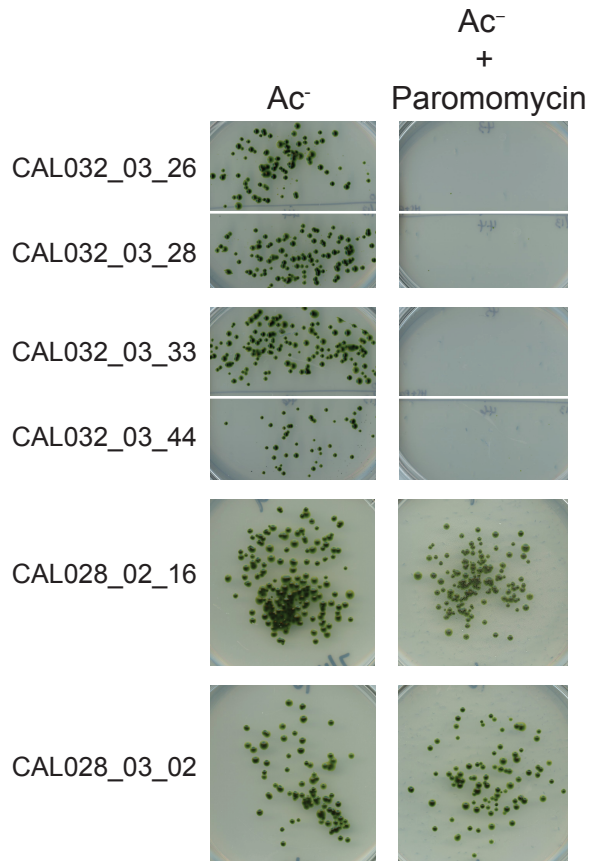

S2 Fig. Genetic linkage test of  $par^R$  and  $Ac^-$  phenotypes. Mutants ( $ac^- par^R$ ) were crossed with WT ( $AC^+ par^S$ ) cells and the zygospores were tested for growth on minimal media with and without paromomycin. Absence of growth on min+paromomycin indicates the genetic linkage of the two phenotypes.

227 not expected to be an exhaustive search for such deletions. For example, low-coverage  
228 regions could be difficult to distinguish from a deletion. Nevertheless, some of the  
229 deletions affected clear candidate genes that could be responsible for the mutant  
230 phenotype. For example, the CAL014\_01\_19 mutant was found to contain a 21-bp  
231 deletion in Cre01.g013801, a GreenCut2 gene (conserved within genomes of land plants  
232 and green algae but absent from non-photosynthetic organisms (15,31)) annotated as a  
233 tocopherol cyclase (*VTE1*). The deletion occurred at the junction of intron 7 and exon 8,  
234 which could affect splicing and translation of a functional protein (S3 Figure). Because  
235 tocopherols are important for photoprotection in *Chlamydomonas* (32) disruption in the  
236 *VTE1* gene could explain this mutant's high light-sensitive phenotype (S1 Table). In  
237 support of this hypothesis, a second mutant in the ARC, CAL033\_02\_19, had a 33-bp  
238 deletion in this locus. Interestingly, this mutant has a less severe phenotype (S1 Table),  
239 consistent with the plasmid insertion and deletion positioned in the 3'-UTR of the gene,  
240 which may have led to a partial loss of function (S3 Figure).

241       Among the 11 mutants whose acetate-requiring phenotype did not cosegregate with  
242 its paromomycin resistance, one (CAL036\_02\_12) had a strong acetate-requiring  
243 phenotype (S1 Table) and contained a 36-kb deletion located 2 Mb away from the  
244 plasmid insertion on chromosome 7. This resulted in a deletion of seven genes  
245 (Cre07.g346050, Cre07.g346100, Cre07.g346150, Cre07.g346200, Cre07.g346250,  
246 Cre07.g346300, and Cre07.g346317). One of these (Cre07.g346050) is *COPPER*  
247 *RESPONSE DEFECT 1* (*CRD1*), and *crd1* mutants have a conditional phenotype, lacking  
248 accumulation of PSI only under copper deficiency (33). Another mutant  
249 (CAL029\_03\_36) has a one-sided insertion in *CRD1* and was only modestly affected in



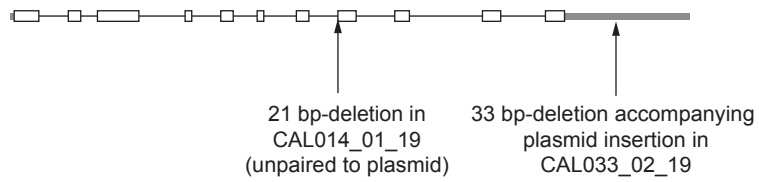

S3 Fig. Two mutant alleles in tocopherol cyclase (Cre01.g013801) in ARC. Schematic representation of the disruption sites in CAL014\_01\_19 a strictly acetate-requiring mutant and CAL032\_02\_19, a mutant with comparatively moderate phenotype.

250 growth in HL (S1 Table), suggesting that the loss of CRD1 is not the cause of the severe  
251 phenotype of CAL036\_02\_12. Another one of the deleted genes is annotated as phytol  
252 kinase (Cre07.g346300). Chlorophyll degradation and phytol remobilization through  
253 phytol kinase (*VTE5*) and phytol phosphate kinase (*VTE6*) are important for  $\alpha$ -tocopherol  
254 biosynthesis and their disruption results in high light sensitivity in tomato (34) and  
255 *Arabidopsis* (35). The light sensitivity observed in CAL036\_02\_12 is similar to that of  
256 tomato plants silenced for *VTE5* (34) and strongly suggests that Cre07.g346300 is the  
257 causative gene for the mutant phenotype. The remaining 10 mutants whose acetate-  
258 requiring phenotype is unlinked to the plasmid insertion would be candidates for higher-  
259 coverage WGS to search for causative mutations.

260

#### 261 **Genes with multiple mutant alleles in the ARC**

262 In total, 1405 genes were directly affected by the 554 plasmid insertions in 509 mutants.  
263 There are many more affected genes compared to the number of mutants from which they  
264 originate due to disruption of multiple genes by large deletions. S3 Table lists all of the  
265 disrupted genes and their available annotations.

266 To begin identifying causative mutations, we searched for genes that were  
267 affected in multiple ARC mutants. Figure 4A shows the number of alleles of the 1405  
268 genes that occur in the ARC. Interruption/deletion of 1053 genes only occurred once,  
269 while 212 genes have two alleles and 94 genes have three alleles. Some genes appeared  
270 on the list of affected genes more than three times (Figure 4A). However, because  
271 disruption of multiple genes occurred in approximately half of the ARC mutants, many of  
272 these genes represented by multiple alleles are likely not causative for the mutant

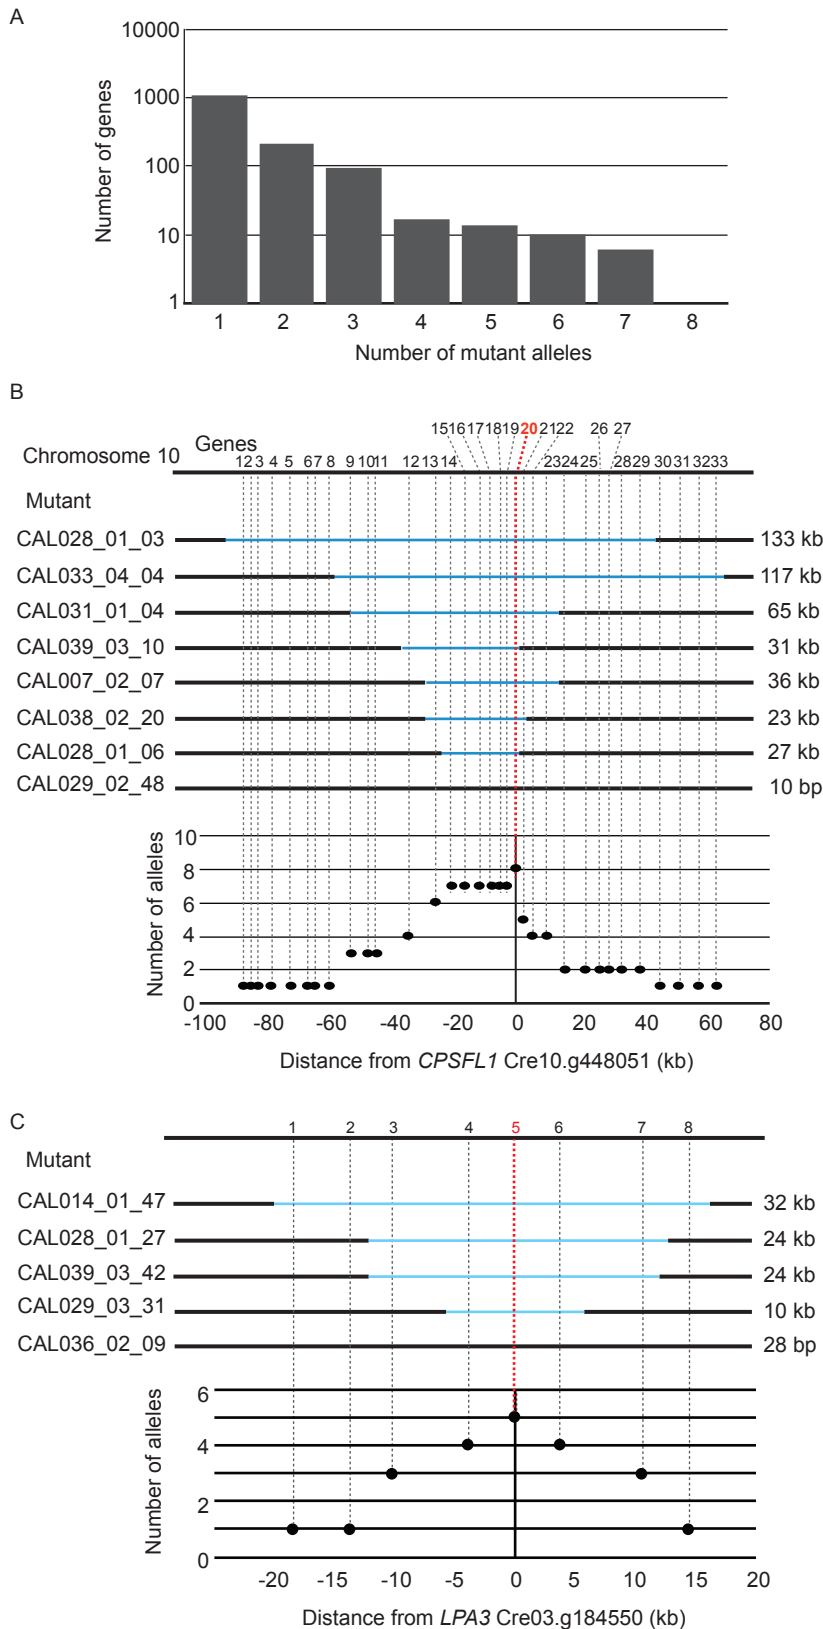

Fig 4. Genes represented by multiple mutant alleles are more likely to be causative genes. (A) Number of genes within all 1407 genes affected in ARC grouped by the number of mutant alleles that represent the gene. Schematic of mutant alleles disrupted in (B) *cpsfl1* mutants and (C) *lpa3* mutants, and the allele frequencies of surrounding genes. Note not all genes with multiple mutant alleles are causative, but rather occur in ARC out of their physical proximity to the true causative genes.

273 phenotype. Some of the genes appear more frequently on the list simply because of their  
274 proximity to the causative gene. Figure 4B shows an example of such an occurrence for  
275 *CPSFL1* (Cre10.g448051). Seven ARC mutants had deletions ranging from 22 to 130 kb  
276 in a region on chromosome 10 (CAL028\_01\_03, CAL033\_04\_04, CAL031\_01\_04,  
277 CAL039\_03\_10, CAL007\_02\_07, CAL038\_02\_20, and CAL028\_01\_06) (S1 Table). 33  
278 genes were affected by the deletions in these mutants, including seven genes affected in  
279 all seven mutants, which makes it difficult to narrow down to a single causative gene.  
280 One additional mutant (CAL29\_02\_48) had a complex insertion event involving four  
281 different chromosomes, but strikingly it shared a single affected gene (*CPSFL1*,  
282 containing a 10-bp deletion) with the other seven mutants. All eight mutants exhibited a  
283 strict acetate-requirement and severe light-sensitivity phenotype (S1 Table), and in-depth  
284 characterization of the CAL028\_01\_06 mutant showed that *CPSFL1* is involved in  
285 carotenoid accumulation and is essential for photoautotrophic growth in *Chlamydomonas*  
286 and *Arabidopsis* (36,37).

287 The *CrLPA3* gene (Cre03.g184550, hereon *LPA3*) is another example of a gene that  
288 was affected in multiple mutants (Figure 4C). The CAL014\_01\_47, CAL028\_01\_27,  
289 CAL039\_03\_42, CAL029\_03\_31, and CAL036\_02\_09 mutants had overlapping  
290 deletions ranging from 28 bp to 32 kb in the same region on chromosome 3, and all five  
291 mutants exhibited a strict acetate-requiring phenotype in HL (S1 Table). By comparing  
292 the disruption frequencies, we identified *LPA3* as the only gene that was affected in all  
293 five mutants.

294

295 ***LPA3* and *PSBP4* are essential for photoautotrophic growth**

296 We proceeded to validate the WGS data and identify two genes as necessary for  
297 photoautotrophic growth in *Chlamydomonas*. In one case (*LPA3*), multiple alleles were  
298 present in the ARC, whereas only a single allele of the other gene *CrPSBP4* (hereon  
299 *PSBP4*) was present. Three *lpa3* mutants (CAL028\_01\_27, CAL039\_03\_42, and  
300 CAL040\_01\_25) were selected for further analysis (and renamed as *lpa3-1*, *lpa3-2*, and  
301 *lpa3-3*, respectively) The WGS data indicated that the *lpa3-1* and *lpa3-2* mutants had  
302 very similar deletions of 24 kb that affected the same five genes (S1 Table). The deletion  
303 was confirmed by amplifying genomic regions across the predicted deletion by PCR in  
304 both mutants (Figure 5A), although it was not possible to amplify the plasmid sequence  
305 at the site of the deletion. The *lpa3-3* mutant was predicted from WGS to have a 4-bp  
306 deletion and plasmid insertion in the 5'-UTR of Cre03.g184550, which was confirmed by  
307 sequencing a PCR fragment of the region from the mutant (Figure 5A), but it was not  
308 included in S1 Table, because it was one of the 79 mutants with a non-unique insertion  
309 site (see above in section "Identification of insertion sites by mapping of discordant read  
310 pairs"). All three mutants had an acetate-requiring phenotype (Figure 4B). The gene  
311 Cre03.g184550 encodes a GreenCut2 protein (CPLD28) (31), and is annotated as an  
312 ortholog of *Arabidopsis* LOW PSII ACCUMULATION 3 (*LPA3*). *Arabidopsis* *LPA3*  
313 has been reported to be involved in the assembly of photosystem II (38), although the  
314 publication on the function of this protein was later retracted (39). Complementation with  
315 a genomic DNA clone of Cre03.g184550 (*LPA3*) including 1.2 kb upstream of the  
316 transcription start site rescued all three mutants, demonstrating that the disruption of this  
317 gene was responsible for the acetate-requiring phenotype of these mutants. Mutants  
318 lacking *LPA3* exhibited very low  $F_v/F_m$  values even in the dark (Figure 5C). This

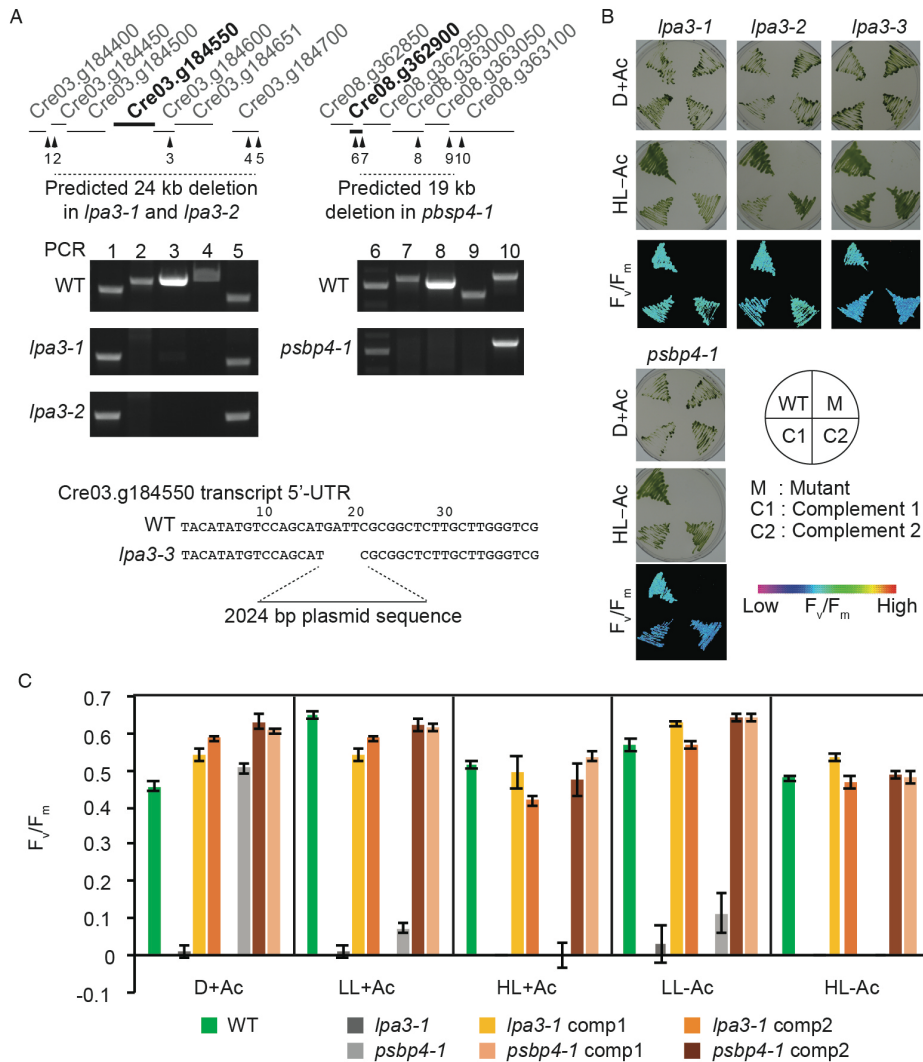

Fig 5. Identification of CrLPA3 and CrPSBP4 required for photoautotrophic growth.

(A) Schematic of loci and deletions indicated from whole-genome sequence data in mutants *lpa3-1* (CAL028\_01\_27), *lpa3-2* (CAL039\_03\_42), and *lpa3-3* (CAL040\_01\_25) that share a disruption in Cre03.g184550, gene encoding a predicted ortholog of Arabidopsis LOW PHOTOSYSTEM II ACCUMULATION 3 (LPA3) and mutant *psbp4-1* (CAL032\_04\_48) that had a deletion encompassing Cre08.g362900, a gene encoding a protein predicted as PSBP4. Numbered arrowheads indicate the PCR probes used in testing for deletions shown in the agarose gel photos. WT and *lpa3-3* sequences indicate the plasmid insertion site and associated 4 bp-deletion. (B) Growth and chlorophyll fluorescence phenotype of WT, mutants and their complemented lines. Cells were grown with acetate in the dark, without acetate under 400  $\mu\text{mol photons s}^{-1} \text{m}^{-2}$  and imaged for growth and  $F_v/F_m$  measurements (HL-Ac).  $F_v/F_m$  value are represented by false colors as shown in the reference bar. (C)  $F_v/F_m$  values of each genotype under different growth conditions. comp, complemented line.

319 suggests that *Chlamydomonas* LPA3 is required for the assembly of PSII even in the  
320 absence of light, resulting in a much more severe phenotype than *lpa3* single mutants in  
321 *Arabidopsis*, which were able to grow in LL on soil (38). The low  $F_v/F_m$  phenotype of the  
322 mutants was rescued in the complemented lines in all light conditions (Figure 5B, C).

323 The mutant CAL032\_04\_48 (renamed as *psbp4-1*) required acetate for growth and  
324 exhibited light sensitivity even in the presence of acetate, and its  $F_v/F_m$  was reduced  
325 compared to that of the WT when grown in the light (S1 Table, Figure 5C). Its WGS  
326 indicated two tandem simple insertions disrupting five genes. Among them,  
327 Cre08.g362900, annotated as encoding a thylakoid luminal PsbP-like protein (PSBP4),  
328 presented itself as a clear candidate to be the gene responsible for the phenotypes. The  
329 PSBP4 ortholog of *Arabidopsis* has been shown to be involved in the assembly of PSI  
330 (40,41). The deletion in *psbp4-1* was confirmed by PCR (Figure 5A), and the mutant  
331 phenotype was rescued by transforming with genomic DNA including Cre08.g362900  
332 and upstream region, demonstrating that disruption of *PSBP4* was the cause of the  
333 acetate-requiring and light-sensitive phenotypes of this mutant (Figure 5B, C).

334

### 335 **Curation of higher-confidence photosynthesis candidate genes**

336 To identify candidate genes that are likely to be responsible for the ARC mutant  
337 phenotypes, we focused on the 406 mutants with only simple insertions (Figure 2). We  
338 reasoned that a mutant with a simple insertion event is more likely to have a causative  
339 gene within its disrupted gene list than a mutant with a complex insertion event that is  
340 accompanied by large-scale chromosomal rearrangements, which could cause  
341 unpredictable changes in expression of neighboring genes due to alterations in promoters,

342 enhancers, and chromatin environment. For each of the 406 mutants with simple  
343 insertions, we applied a series of criteria to generate a list of genes that are the strongest  
344 confidence candidates for being genes that are responsible for the ARC mutant  
345 phenotype. If a mutant contained a single, simple insertion that disrupts a single gene  
346 then that gene was immediately considered to be a higher-confidence candidate. If a  
347 mutant contained a simple insertion with multiple genes disrupted by an associated  
348 deletion, then we manually analyzed the genes and selected the best candidate,  
349 considering whether it was a GreenCut2 gene and/or whether it encoded a protein with  
350 annotation or domains indicating a possible function in photosynthesis (e.g. redox,  
351 chlorophyll *a/b*-binding, Fe-S cluster). 78 GreenCut2 genes that were disrupted in 509  
352 ARC mutants (Table 1) and were considered strong candidates unless there was an even  
353 stronger candidate based on functional annotation. As was shown for *cpsfl1* (Figure 4B)  
354 and *lpa3* (Figure 4C), mutants with overlapping disrupted genes were also compared to  
355 find the strongest candidate (gene with highest disruption frequency). Neighboring genes  
356 that were co-disrupted with the strongest candidates were deemed non-candidates in all  
357 the mutants. As a final criterion, we searched candidate genes derived from analysis of  
358 other existing photosynthesis mutant libraries and identified overlaps with  
359 *Chlamydomonas* genes whose disruption affected photoautotrophic growth (9),  
360 orthologous genes from the maize Photosynthetic Mutant Library (PML,  
361 [http://pml.uoregon.edu/pml\\_table.php](http://pml.uoregon.edu/pml_table.php)) (42), and orthologous genes identified from  
362 Dynamic Environmental Photosynthetic Imaging (DEPI) of *Arabidopsis* mutants (43).

363 We were able to identify a higher-confidence candidate gene for 348 out of 436  
364 mutants with simple insertions. Because there were multiple alleles of 59 genes, this



365 resulted in 273 higher-confidence candidate genes, which are shown in Table 2 (and S4  
366 Table with additional details and references). This list includes genes known to be  
367 important for photosynthesis, photoprotection, and peripheral functions (S4 Table,  
368 Column “Inferred function from Cr and other photosynthetic organisms”). 106 gene  
369 products were predicted to be targeted to the chloroplast by protein targeting software  
370 Predalgo (<https://giavap-genomes.ibpc.fr/cgi-bin/predalgotdb.perl?page=main>) (44), and  
371 among those, 61 were also predicted to be targeted to plastids by ChloroP  
372 (<http://www.cbs.dtu.dk/services/ChloroP/>) (45) (Table 2, S4 Table). 55 GreenCut2 genes  
373 are within this higher-confidence list, leaving 23 GreenCut2 genes that were not chosen  
374 because there was a stronger candidate gene (see column “Comments” in Table 2), an  
375 indication that not all GreenCut2 genes may be critical for photosynthesis. Among the  
376 273 candidates, the photosynthetic functions of 68 genes have been previously described  
377 in *Chlamydomonas*, land plants, or cyanobacteria. This leaves 205 genes whose functions  
378 remain to be studied in context of photosynthesis, 47 of which have no annotation (S4  
379 Table).

380

## 381 **Discussion**

382 We successfully used high-throughput, low-coverage WGS for the identification of  
383 plasmid insertion sites in our *Chlamydomonas* photosynthesis mutant collection (ARC).  
384 This approach has a much higher efficiency than PCR-based FST isolation. From the  
385 larger collection of 2800 mutants (7) from which ARC was derived, we recovered FSTs  
386 from only 17% of the mutants, whereas our WGS identified insertions in 509 out of 581  
387 non-redundant ARC mutants (88% success among the population). We attribute this

388 improvement to the fact that insertion site identification by WGS is not dependent on the  
389 intactness or sequence continuity of the inserted plasmid sequence, and therefore WGS  
390 overcomes complications such as plasmid concatemerization and loss of plasmid ends to  
391 which PCR primers need to anneal. Most importantly, it completely bypasses the need for  
392 PCR from the GC- and repeat-rich genome of *Chlamydomonas*. Even with relatively low  
393 average WGS coverage (~7x), we also identified 68 deletions that were not associated  
394 with plasmid insertions, some of which may be causative mutations for photosynthesis-  
395 related phenotypes that are unlinked to the plasmid insertion in specific mutants.

396 A previous study using WGS to identify DNA insertion events in *Chlamydomonas*  
397 (21) provides the most direct comparison with our results. Lin et al. (2018) analyzed  
398 paromomycin-resistant insertional mutants derived from electroporation instead of the  
399 glass bead transformation method that we used to generate either paromomycin- or  
400 zeocin-resistant mutants (9). They sequenced 20 transformants in 10 pools of two strains  
401 and verified 38 insertions, obtaining an average of 1.9 insertions per strain. In contrast,  
402 we found a total of 554 insertions in 509 mutants, resulting in a lower average of ~1.1  
403 insertions per mutant. Lin et al. (2018) found that more than half (11 of 20) of their  
404 strains had more than one insertion event, and a larger collection of 1935 mutants derived  
405 from electroporation exhibited multiple insertions in 26% of strains (10). We found  
406 multiple insertions in 8% (43 out of 509) of the ARC mutants, suggesting that glass bead  
407 transformation of *Chlamydomonas* results in a higher frequency of single-copy insertions.  
408 Lin et al. (2018) identified one-sided insertions in ~40% of their mutants, whereas we  
409 observed only ~4% (21 out of 554 insertion events), despite the lower average WGS  
410 coverage in our study (~7x vs. ~15x). The frequency of complex rearrangements in our

411 study (19%) was comparable to that observed by Lin et al. (25%), however, as previously  
412 noted by us and others (7,10,21,46), glass bead transformation seems to be frequently  
413 associated with larger deletions of genomic DNA at the sites of DNA insertion than  
414 electroporation, a finding that was clearly evident in our WGS data (Figure 3A).

415 In part because of the occurrence of larger deletions, 1405 genes were disrupted in  
416 509 ARC mutants. As expected, this list is enriched for genes that encode proteins with  
417 annotated functions in photosynthesis and tetrapyrrole synthesis, and it includes 78  
418 GreenCut2 genes (31). We examined the affected genes in each mutant to identify  
419 possible causative genes using several criteria, including GreenCut2 membership,  
420 existence of protein domains suggestive of a function in photosynthesis, and occurrence  
421 of multiple mutant alleles in the ARC. We also searched for overlaps with available  
422 photosynthesis mutant datasets, namely CLiP (*Chlamydomonas*), PML (maize), DEPI  
423 (*Arabidopsis*), and those found co-expressed with photosynthesis genes  
424 (*Chlamydomonas*). The CLiP collection has been used to identify mutants that are  
425 defective in photosynthetic growth in pooled cultures (9). This study identified 303  
426 candidate photosynthesis genes. We identified 41 of those 303 genes in our list of 273  
427 higher-confidence genes (Table 2, S4 Table). This overlap is lower than might be  
428 expected but could be explained simply by the fact that both the CLiP and ARC mutant  
429 collections are based on a total of ~60,000 insertional mutants, which is not sufficient to  
430 saturate the *Chlamydomonas* genome for mutations affecting photosynthesis. The maize  
431 PML consists of approximately 2100 photosynthesis mutants that contain 50 to 100 *Mu*  
432 transposable elements per individual. It is estimated to be a saturated collection with 3-4  
433 mutant alleles for ~600 genes (42). The FSTs of this library were obtained with Illumina

434 sequencing of fragmented gDNA that was enriched for the *Mu* element (22). Our higher-  
435 confidence candidate gene list overlapped with 17 genes identified from the maize PML  
436 (<http://pml.uoregon.edu/photosyntheticml.html>). DEPI screening of 300 *Arabidopsis*  
437 mutants affecting genes that encode chloroplast-targeted proteins (Chloroplast 2010  
438 project, <http://www.plastid.msu.edu/>) identified 12 mutants with altered photosynthetic  
439 response (43). These mutants likely represent disruption in genes that are conditionally  
440 important in acclimation to changing light environments. Two of the 12 genes found  
441 through DEPI overlapped with our higher-confidence photosynthesis candidate gene list.  
442 The largest overlap (84 genes) was observed between our higher-confidence list and the  
443 group of photosynthesis-related genes defined based on co-expression analysis (47).

444 For two of the higher-confidence photosynthesis genes, *LPA3* and *PSBP4*, we  
445 validated the insertion-associated lesions for four of the ARC mutants and demonstrated  
446 their requirement for photoautotrophic growth (Figure 5). *LPA3* is a GreenCut2 protein  
447 (CPLD28) that contains a DUF1995 domain. Insertion mutants containing large or small  
448 deletions in *LPA3* (Cre03.g184550) were acetate-requiring and exhibited a severe defect  
449 in PSII function even in the dark, as evidenced by  $F_v/F_m$  values near zero (Figure 5).  
450 Mutants affecting Cre02.g105650 and Cre10.g441650, two *Chlamydomonas* genes  
451 coding for proteins similar to *Arabidopsis* *LPA2*, were not found in the ARC. However,  
452 there are two additional genes encoding DUF1995 proteins in the *Chlamydomonas*  
453 genome, Cre06.g281800 and Cre08.g369000. The mutant CAL038\_02\_36 is disrupted in  
454 Cre06.g281800. It does not grow photoautotrophically but is able to grow in LL and HL  
455 in the presence of acetate. Interestingly, this mutant also has an  $F_v/F_m$  of zero in the dark  
456 (S1 Table). The severe phenotypes of these mutants in *Chlamydomonas* indicate non-

457 overlapping functions in PSII assembly of the gene products of *LPA3* and

458 Cre06.g281800.

459 PSBP (encoded by *PSBP1/OEE2* in *Chlamydomonas*) together with PSBO and  
460 PSBQ constitute the oxygen-evolving complex (OEC) of PSII (48,49). In green algae and  
461 plants, PSBP appears to have expanded into a large family of proteins sharing similar  
462 domains beyond the canonical PSBP of the OEC. The *Chlamydomonas* genome contains  
463 13 additional genes encoding proteins with PsbP-like domains whose individual functions  
464 are unknown. We showed that PSBP4 is required for photoautotrophic growth in  
465 *Chlamydomonas*, ruling out redundancy in its function with other PSBP-like domain-  
466 containing proteins. An *Arabidopsis* ortholog of CrPSBP4 (AT4g15510, PPD1) has been  
467 shown to play a role in PSI assembly (40,41), which is consistent with the light-  
468 sensitivity of our *psbp4-1* mutant. Two other members of the PSBP family, *PSBP3*, and  
469 *PSBP9*, were found to be disrupted in the ARC. The large family of PSBP-like domain-  
470 containing proteins is speculated to have resulted in divergence of their functions (50),  
471 and the availability of mutants in these genes should help to reveal their functions.

472 Of the 273 higher-confidence candidate photosynthesis genes that we curated  
473 based on WGS analysis of the ARC, only 68 have a previously demonstrated function in  
474 photosynthesis. This is similar to the results of pooled growth analysis of ~60,000  
475 *Chlamydomonas* insertional mutants by Li et al. (2019), which revealed 303 candidate  
476 photosynthesis genes, of which only 65 have previously known roles in photosynthesis  
477 (9). Thus, 238 genes in the study of Li et al. (2019) and 205 genes in our study remain to  
478 be analyzed experimentally to determine their specific functions in photosynthesis.  
479 Moreover, the fact that only 42 genes are shared by these two sets of candidate

480 photosynthesis genes suggests that there are still many more photosynthesis genes that  
481 remain to be identified, which highlights the enormous potential for future validation and  
482 discovery of new proteins involved in oxygenic photosynthesis.

483

## 484 **Material and methods**

### 485 **Strains and culture conditions**

486 Mutants described in this work were generated from wild-type strain 4A+ (CC-4051 in  
487 the 137c background. Cells were grown mixotrophically (ac) on Tris-acetate-phosphate  
488 (TAP) medium and photoautotrophically (min) on minimal high-salt medium (HS)  
489 medium (51) in low light (LL) of 60-80  $\mu\text{mol photons m}^{-2} \text{ s}^{-1}$  and high light (HL) of 350-  
490 400  $\mu\text{mol photons m}^{-2} \text{ s}^{-1}$ . LL and HL conditions were obtained using GE  
491 F25T8/SPX41/ECO and Sylvania F72T12/CW/VHO fluorescent bulbs, respectively.

492

### 493 **Genomic DNA preparation and whole-genome sequencing**

494 *Chlamydomonas* cultures were grown in 20 mL TAP to stationary phase, and genomic  
495 DNA was extracted using an alkaline lysis buffer (50 mM Tris-HCl (pH 8), 200 mM  
496 NaCl, 20 mM EDTA, 2% SDS, 1% PVP 40,000, 1 mg/mL Proteinase K) followed by  
497 phenol-chloroform extraction. DNA was collected, washed and eluted using DNeasy  
498 Plant mini-columns (QIAGEN). The resulting quality of the DNA was confirmed to be  
499  $A_{260}/A_{280}$  of approximately 1.8 and  $A_{260}/A_{230}$  of  $>2$ . Plate-based DNA library preparation  
500 for Illumina sequencing was performed on the PerkinElmer Sciclone NGS robotic liquid  
501 handling system using Kapa Biosystems library preparation kit. 200 ng of sample DNA  
502 was sheared to 600 bp using a Covaris LE220 focused ultrasonicator. The sheared DNA

503 fragments were size selected by double-SPRI, and then the selected fragments were end-  
504 repaired, A-tailed, and ligated with Illumina-compatible sequencing adaptors from IDT  
505 containing a unique molecular index barcode for each sample library. The prepared  
506 libraries were quantified using KAPA Biosystem's next-generation sequencing library  
507 qPCR kit and run on a Roche LightCycler 480 real-time PCR instrument. The quantified  
508 libraries were then multiplexed with other libraries, and the pool of libraries was then  
509 prepared for sequencing on the Illumina HiSeq sequencing platform utilizing a TruSeq  
510 paired-end cluster kit, v4, and Illumina's cBot instrument to generate a clustered flow cell  
511 for sequencing. Sequencing of the flow cell was performed on the Illumina HiSeq2500  
512 sequencer using HiSeq TruSeq SBS sequencing kits, v4, following a 2x150 indexed run  
513 recipe. The reads were aligned to the reference genome using BWA-mem. To identify  
514 plasmid insertion sites, discordant paired-end reads with one end mapping to the plasmid  
515 used for mutagenesis and the other to a chromosome location were mapped and manually  
516 validated for each mutant using Integrated Genome Viewer (IGV)  
517 (<http://software.broadinstitute.org/software/igv/home>). Putative structural variations  
518 unpaired to the plasmid sequence were called using a combination of BreakDancer  
519 (filtered to quality 90+) and Pindel and manually validated using IGV. Resulting genome  
520 sequences of 79 mutants were not unique (33 were duplicated, three were triplicated and  
521 one was quadruplicated). In all cases the mutants sharing similar sequences came from  
522 the same agar plate and sequencing plate, suggesting that it could be due to an error at the  
523 genome extraction step or in maintenance of the mutant strains; these mutants were not  
524 included in further analysis.  
525

## 526 **Molecular analyses of mutants by PCR and mutant complementation**

527 Deletions predicted from genome sequences were confirmed by using PCR primers that  
528 anneal proximal to the borders and within the deletions. The insertion of the plasmid  
529 sequence accompanied by a 4 bp-deletion in *lpa3-3* was sequenced from the PCR product  
530 from the predicted region. Primers used for PCRs indicated in Figure 4 are listed in  
531 Supplemental S4 Table. For complementation of *lpa3-1*, *lpa3-2*, and *lpa3-3*, a 3531 bp  
532 genomic fragment containing the full length *CrLPA3* gene (Cre03.g184550) with 1209 bp  
533 upstream of the start codon and 719 bp downstream of the stop codon was amplified  
534 using primers Comp11F and Comp11R. This fragment was subsequently Gibson cloned  
535 into the vector pSP124S using primers PS1362 and PS1363 to inverse PCR around  
536 pSP124S. For complementation of mutant *psbp4-1*, a 3246 bp genomic fragment  
537 containing the full length *CrPSBP4* gene (Cre08.g362900), including 1209 bp upstream  
538 of the start codon and 719 bp downstream of the stop codon, was amplified using primers  
539 Comp12F and Comp12R and similarly cloned into vector pSP124S. Primer sequences are  
540 listed in supplemental S4 Table. Constructs for complementation were transformed into  
541 the respective mutants using the glass bead method (52). Colonies were selected on 10  
542  $\mu$ M zeocin TAP agar plates and screened for rescued individuals by measuring  $F_v/F_m$  as  
543 described below.

544

## 545 **$F_v/F_m$ measurement**

546 *Chlamydomonas* strains were grown on agar plates in Dark+ac, LL-min, or HL-min,  
547 and  $F_v/F_m$  ( $F_m - F_o / F_m$ ) was measured using a chlorophyll fluorescence video imager  
548 (IMAG-MAX/L, WALZ). Plates with the streaks of strains were dark-acclimated for



549 30 min and exposed to a pulse of saturating light ( $4000 \mu\text{mol photons m}^{-2} \text{s}^{-1}$ ).

550 Fluorescence images of  $F_m$  and  $F_o$  were captured during saturating pulses, and false-  
551 color images of  $F_v/F_m$  were generated.

552

### 553 **Acknowledgments**

554 We thank Alice Barkan for sharing the data for PML to compare with ARC higher-  
555 confidence candidate genes and Sabeeha Merchant, Masakazu Iwai, and Dhruv Patel for  
556 critical reading of the manuscript. This work was supported by the U.S. Department of  
557 Energy, Office of Science, Basic Energy Sciences, Chemical Sciences, Geosciences, and  
558 Biosciences Division under field work proposal 449B. The work conducted by the U.S.  
559 Department of Energy Joint Genome Institute, a DOE Office of Science User Facility, is  
560 supported by the Office of Science of the U.S. Department of Energy under Contract No.  
561 DE-AC02-05CH11231. K.K.N. is an investigator of the Howard Hughes Medical  
562 Institute.

563

### 564 **Competing interests**

565 The authors declare no competing interests.

566 **Supporting information**

567 S1 Table. Plasmid-paired and unpaired discordant sites detected in ARC by WGS and

568 mutant phenotypes.

569 S2 Table. Mutants with deletions unassociated with plasmid insertion.

570 S3 Table. Total genes affected in ARC and their description.

571 S4 Table. Higher-confidence candidate genes and corresponding mutants.

572 S5 Table. List of PCR primers used in this study.

573 S1 Fig. Proportion of different types of insertions observed in ARC.

574 S2 Fig. Genetic linkage test of par<sup>R</sup> and Ac- phenotypes.

575 S3 Fig. Two mutant alleles in tocopherol cyclase (Cre01.g013801, *VTE1*) in ARC.

576 S1 Appendix. Citations from S4 Table.

577

578 **Figures and Tables**

579 Table 1. GreenCut2 genes affected in ARC.

580 Table 2. Higher confidence photosynthesis candidate genes.

581 **Figure legends**

582

583 Fig 1. Growth and chlorophyll fluorescence screen pipeline.

584 Mutants were scored for growth on (A) D+ac, (B) LL+ac, (C) HL+ac, (D)

585 LL+ac+zeocin, (E) LL-min, (F) HL-min.  $F_v/F_m$  values were measured on cells grown on

586 (G) D+ac, (H) LL-min, (I) HL-min. FST, flanking sequence tag. A representative plate

587 spotted from a 96-well plate is shown. D, dark; LL, low light; HL, high light; +ac, added

588 acetate; min, minimal media.

589

590 Fig 2. Examples of structural variations and the frequency mutants with simple or

591 complex insertions in ARC.

592 Boxes contain schematic examples of mapped reads as seen in IGV. Black box, mapped

593 reads (concordant and discordant) against plasmid and chromosome. Blue box, examples

594 of “Simple insertions”; Gray box, examples of “Complex insertions”. Gray box shows

595 examples of different complex insertions that are intra- or interchromosomal

596 rearrangements. Second from left in gray box shows a possible translocation between two

597 chromosomes. Pie chart shows frequency of “Simple mutants” containing only simple

598 insertions and “Complex mutants” containing complex insertions.

599

600 Fig 3. Structural variation accompanying insertions.

601 (A) Duplication and deletion sizes and (B) number of mutants grouped by the number of

602 genes affected by two-sided insertions. Only two-sided insertions were included in this

603 analysis.

604

605 Fig 4. Genes represented by multiple mutant alleles are more likely to be causative genes.  
606 (A) Number of genes among all 1405 genes affected in ARC grouped by the number of  
607 mutant alleles that represent the gene. Schematic of mutant alleles disrupted in (B) *cpsf11*  
608 mutants and (C) *lpa3* mutants and the allele frequencies of surrounding genes. Note that  
609 not all genes with multiple mutant alleles are causative; some occur among the 1405  
610 affected genes because of their physical proximity to the true causative genes.

611  
612 Fig 5. Identification of *CrLPA3* and *CrPSBP4* required for photoautotrophic growth.  
613 (A) Schematic of loci and deletions indicated from whole-genome sequence data in  
614 mutants *lpa3-1* (CAL028\_01\_27), *lpa3-2* (CAL039\_03\_42), and *lpa3-3*  
615 (CAL040\_01\_25) that share a disruption in Cre03.g184550, gene encoding a predicted  
616 ortholog of Arabidopsis LOW PHOTOSYSTEM II ACCUMULATION 3 (LPA3) and  
617 mutant *psbp4-1* (CAL032\_04\_48) that had a deletion encompassing Cre08.g362900, a  
618 gene encoding a protein predicted as PSBP4. Numbered arrowheads indicate the PCR  
619 probes used in testing for deletions shown in the agarose gel photos. WT and *lpa3-3*  
620 sequences indicate the plasmid insertion site and associated 4 bp-deletion. (B) Growth  
621 and chlorophyll fluorescence phenotype of WT, mutants and their complemented lines.  
622 Cells were grown with acetate in the dark, without acetate under 400  $\mu\text{mol photons s}^{-1} \text{ m}^{-2}$   
623 and imaged for growth and  $F_v/F_m$  measurements (HL-Ac).  $F_v/F_m$  value are represented  
624 by false colors as shown in the reference bar. (C)  $F_v/F_m$  values of each genotype under  
625 different growth conditions. comp, complemented line.

626

627

628 **References**

- 629 1. Harris EH. *Chlamydomonas* as a model organism. Annu Rev Plant Biol.  
630 2001;52:363–406.
- 631 2. Salomé PA, Merchant SS. A series of fortunate events: Introducing  
632 *Chlamydomonas* as a reference organism. Vol. 31, Plant Cell. 2019. p. 1682–707.
- 633 3. Levine RP. A screening technique for photosynthetic mutants in unicellular algæ.  
634 Nature. 1960;188(4747):339–40.
- 635 4. Dent RM, Han M, Niyogi KK. Functional genomics of plant photosynthesis in the  
636 fast lane using *Chlamydomonas reinhardtii*. Vol. 6, Trends in Plant Science. 2001.  
637 p. 364–71.
- 638 5. Goodenough UW, Armstrong JJ, Levine RP. Photosynthetic Properties of *ac-31*, a  
639 Mutant Strain of *Chlamydomonas reinhardtii* Devoid of Chloroplast Membrane  
640 Stacking. Plant Physiol [Internet]. 1969 Jul 1;44(7):1001 LP – 1012. Available  
641 from: <http://www.plantphysiol.org/content/44/7/1001.abstract>
- 642 6. Sager R, Granick S. Nutritional studies with *Chlamydomonas reinhardtii*. Ann N Y  
643 Acad Sci. 1953;56(5):831–8.
- 644 7. Dent RM, Sharifi MN, Malnoë A, Haglund C, Calderon RH, Wakao S, et al.  
645 Large-scale insertional mutagenesis of *Chlamydomonas* supports phylogenomic  
646 functional prediction of photosynthetic genes and analysis of classical acetate-  
647 requiring mutants. Plant J. 2015;82(2):337–51.
- 648 8. Zhang R, Patena W, Armbruster U, Gang SS, Blum SR, Jonikas MC. High-  
649 throughput genotyping of green algal mutants reveals random distribution of  
650 mutagenic insertion sites and endonucleolytic cleavage of transforming DNA.

- 651 Plant Cell. 2014;26(4):1398–409.
- 652 9. Li X, Patena W, Fauser F, Jinkerson RE, Saroussi S, Meyer MT, et al. A genome-  
653 wide algal mutant library and functional screen identifies genes required for  
654 eukaryotic photosynthesis. Nat Genet. 2019;51(4):627–35.
- 655 10. Li X, Zhang R, Patena W, Gang SS, Blum SR, Ivanova N, et al. An indexed,  
656 mapped mutant library enables reverse genetics studies of biological processes in  
657 *Chlamydomonas reinhardtii*. Plant Cell. 2016;28(2):367–87.
- 658 11. Lin H, Miller ML, Granas DM, Dutcher SK. Whole Genome Sequencing Identifies  
659 a Deletion in Protein Phosphatase 2A That Affects Its Stability and Localization in  
660 *Chlamydomonas reinhardtii*. PLoS Genet. 2013;9(9).
- 661 12. Dutcher SK, Li L, Lin H, Meyer L, Giddings TH, Kwan AL, et al. Whole-genome  
662 sequencing to identify mutants and polymorphisms in *Chlamydomonas reinhardtii*.  
663 G3 Genes, Genomes, Genet. 2012;2(1):15–22.
- 664 13. Tulin F, Cross FR. Patching holes in the *Chlamydomonas* genome. G3 Genes,  
665 Genomes, Genet. 2016;6(7):1899–910.
- 666 14. Breker M, Lieberman K, Cross FR. Comprehensive discovery of cell-cycle-  
667 essential pathways in *Chlamydomonas reinhardtii*. Plant Cell. 2018;30(6):1178–  
668 98.
- 669 15. Merchant SS, Prochnik SE, Vallon O, Harris EH, Karpowicz SJ, Witman GB, et  
670 al. The *Chlamydomonas* genome reveals the evolution of key animal and plant  
671 functions. Science. 2007;318(5848):245–51.
- 672 16. Schierenbeck L, Ries D, Rogge K, Grewe S, Weisshaar B, Kruse O. Fast forward  
673 genetics to identify mutations causing a high light tolerant phenotype in

- 674 *Chlamydomonas reinhardtii* by whole-genome-sequencing. BMC Genomics.  
675 2015;16(1).
- 676 17. Gabilly ST, Baker CR, Wakao S, Crisanto T, Guan K, Bi K, et al. Regulation of  
677 photoprotection gene expression in *Chlamydomonas* by a putative E3 ubiquitin  
678 ligase complex and a homolog of CONSTANS. Proc Natl Acad Sci U S A.  
679 2019;116(35):17556–62.
- 680 18. Smith HE. Identifying insertion mutations by whole-genome sequencing.  
681 Biotechniques. 2011;50(2):96–7.
- 682 19. Cao Y, Rui B, Wellems DL, Li M, Chen B, Zhang D, et al. Identification of  
683 piggyBac-mediated insertions in *Plasmodium berghei* by next generation  
684 sequencing. Malar J. 2013;12(1).
- 685 20. Urban M, King R, Hassani-Pak K, Hammond-Kosack KE. Whole-genome analysis  
686 of *Fusarium graminearum* insertional mutants identifies virulence associated genes  
687 and unmasks untagged chromosomal deletions. BMC Genomics. 2015;16(1).
- 688 21. Lin H, Cliften PF, Dutcher SK. MAPINS, a highly efficient detection method that  
689 identifies insertional mutations and complex DNA rearrangements. Plant Physiol.  
690 2018;178(4):1436–47.
- 691 22. Williams-Carrier R, Stiffler N, Belcher S, Kroeger T, Stern DB, Monde RA, et al.  
692 Use of Illumina sequencing to identify transposon insertions underlying mutant  
693 phenotypes in high-copy *Mutator* lines of maize. Plant J. 2010;63(1):167–77.
- 694 23. Alonso JM, Stepanova AN, Leisse TJ, Kim CJ, Chen H, Shinn P, et al. Genome-  
695 wide insertional mutagenesis of *Arabidopsis thaliana*. Science.  
696 2003;301(5633):653–7.



- 697 24. Strizhov N, Li Y, Rosso MG, Viehovever P, Dekker KA, Weisshaar B. High-  
698 throughput generation of sequence indexes from T-DNA mutagenized *Arabidopsis*  
699 *thaliana* lines. *Biotechniques*. 2003;35(6):1164–8.
- 700 25. Sessions A, Burke E, Presting G, Aux G, McElver J, Patton D, et al. A high-  
701 throughput *Arabidopsis* reverse genetics system. *Plant Cell*. 2002;14(12):2985–94.
- 702 26. Dent RM. Functional Genomics of Eukaryotic Photosynthesis Using Insertional  
703 Mutagenesis of *Chlamydomonas reinhardtii*. *Plant Physiol* [Internet].  
704 2005;137(2):545–56. Available from:  
705 <https://www.ncbi.nlm.nih.gov/pubmed/15653810>
- 706 27. Heinnickel ML, Alric J, Wittkopp T, Yang W, Catalanotti C, Dent R, et al. Novel  
707 thylakoid membrane GreenCut protein CPLD38 impacts accumulation of the  
708 cytochrome *b<sub>6</sub>f* complex and associated regulatory processes. *J Biol Chem*.  
709 2013/01/11. 2013;288(10):7024–36.
- 710 28. Peers G, Truong TB, Ostendorf E, Busch A, Elrad D, Grossman AR, et al. An  
711 ancient light-harvesting protein is critical for the regulation of algal  
712 photosynthesis. *Nature*. 2009;
- 713 29. Calderon RH, García-Cerdán JG, Malnoë A, Cook R, Russell JJ, Gaw C, et al. A  
714 conserved rubredoxin is necessary for photosystem II accumulation in diverse  
715 oxygenic photoautotrophs. *J Biol Chem*. 2013;288(37):26688–96.
- 716 30. Ye K, Schulz MH, Long Q, Apweiler R, Ning Z. Pindel: A pattern growth  
717 approach to detect break points of large deletions and medium sized insertions  
718 from paired-end short reads. *Bioinformatics*. 2009;25(21):2865–71.
- 719 31. Karpowicz SJ, Prochnik SE, Grossman AR, Merchant SS. The GreenCut2

- 720 resource, a phylogenomically derived inventory of proteins specific to the plant  
721 lineage. *J Biol Chem.* 2011;286(24):21427–39.
- 722 32. Li Z, Keasling JD, Niyogi KK. Overlapping photoprotective function of vitamin E  
723 and carotenoids in *Chlamydomonas*. *Plant Physiol.* 2011/11/15. 2012;158(1):313–  
724 23.
- 725 33. Moseley J, Quinn J, Eriksson M, Merchant S. The *Crd1* gene encodes a putative  
726 di-iron enzyme required for photosystem I accumulation in copper deficiency and  
727 hypoxia in *Chlamydomonas reinhardtii*. *EMBO J.* 2000;19(10):2139–51.
- 728 34. Spicher L, Almeida J, Gutbrod K, Pipitone R, Dörmann P, Glauser G, et al.  
729 Essential role for phytol kinase and tocopherol in tolerance to combined light and  
730 temperature stress in tomato. *J Exp Bot.* 2017;68(21–22):5845–56.
- 731 35. Dorp K Vom, Hölzl G, Plohmann C, Eisenhut M, Abraham M, Weber APM, et al.  
732 Remobilization of Phytol from Chlorophyll Degradation is Essential for  
733 Tocopherol Synthesis and Growth of Arabidopsis. *Plant Cell.* 2015;27(10):2846–  
734 59.
- 735 36. García-Cerdán JG, Schmid EM, Takeuchi T, McRae I, McDonald KL,  
736 Yordduangjun N, et al. Chloroplast Sec14-like 1 (CPSFL1) is essential for normal  
737 chloroplast development and affects carotenoid accumulation in *Chlamydomonas*.  
738 *Proc Natl Acad Sci U S A.* 2020;117(22):12452–63.
- 739 37. Hertle AP, García-Cerdán JG, Armbruster U, Shih R, Lee JJ, Wong W, et al. A  
740 Sec14 domain protein is required for photoautotrophic growth and chloroplast  
741 vesicle formation in *Arabidopsis thaliana*. *Proc Natl Acad Sci U S A.*  
742 2020;117(16):9101–11.

- 743 38. Cai W, Ma J, Chi W, Zou M, Guo J, Lu C, et al. Cooperation of LPA3 and LPA2  
744 Is Essential for Photosystem II Assembly in Arabidopsis. *Plant Physiol.*  
745 2010;154(1):109–20.
- 746 39. Retraction to Cooperation of LPA3 and LPA2 Is essential for photosystem II  
747 assembly in Arabidopsis (*Plant Physiol*, (2010) 154, (109-120),  
748 10.1104/pp.110.159558). Vol. 173, *Plant Physiology*. 2017. p. 1526.
- 749 40. Roose JL, Frankel LK, Bricker TM. The PsbP domain protein 1 functions in the  
750 assembly of lumenal domains in photosystem I. *J Biol Chem*.  
751 2014;289(34):23776–85.
- 752 41. Liu J, Yang H, Lu Q, Wen X, Chen F, Peng L, et al. PSBP-DOMAIN PROTEIN1,  
753 a Nuclear-Encoded thylakoid lumenal protein, is essential for photosystem I  
754 assembly in Arabidopsis. *Plant Cell*. 2013;24(12):4992–5006.
- 755 42. Belcher S, Williams-Carrier R, Stiffler N, Barkan A. Large-scale genetic analysis  
756 of chloroplast biogenesis in maize. Vol. 1847, *Biochimica et Biophysica Acta -*  
757 *Bioenergetics*. 2015. p. 1004–16.
- 758 43. Cruz JA, Savage LJ, Zegarac R, Hall CC, Satoh-Cruz M, Davis GA, et al.  
759 Dynamic Environmental Photosynthetic Imaging Reveals Emergent Phenotypes.  
760 *Cell Syst*. 2016;2(6):365–77.
- 761 44. Tardif M, Atteia A, Specht M, Cogne G, Rolland N, Brugière S, et al. Predalgo: A  
762 new subcellular localization prediction tool dedicated to green algae. In: *Molecular*  
763 *Biology and Evolution*. 2012. p. 3625–39.
- 764 45. Emanuelsson O, Nielsen H, Heijne G Von. ChloroP, a neural network-based  
765 method for predicting chloroplast transit peptides and their cleavage sites. *Protein*

- 766           Sci. 1999;8(5):978–84.
- 767   46.   Pollock S V., Mukherjee B, Bajsa-Hirschel J, Machingura MC, Mukherjee A,  
768           Grossman AR, et al. A robust protocol for efficient generation, and genomic  
769           characterization of insertional mutants of *Chlamydomonas reinhardtii*. Plant  
770           Methods. 2017;13(1).
- 771   47.   Salomé PA, Merchant SS. Co-Expression Networks in the Green Alga  
772           *Chlamydomonas reinhardtii* Empower Gene Discovery and Functional  
773           Exploration. bioRxiv. 2020.
- 774   48.   Rova M, Franzén LG, Fredriksson PO, Styring S. Photosystem II in a mutant of  
775           *Chlamydomonas reinhardtii* lacking the 23 kDa psbP protein shows increased  
776           sensitivity to photoinhibition in the absence of chloride. Photosynth Res.  
777           1994;39(1):75–83.
- 778   49.   de Vitry C, Olive J, Drapier D, Recouvreur M, Wollman FA. Posttranslational  
779           events leading to the assembly of photosystem II protein complex: a study using  
780           photosynthesis mutants from *Chlamydomonas reinhardtii*. J Cell Biol.  
781           1989;109(3):991–1006.
- 782   50.   Ifuku K, Ishihara S, Shimamoto R, Ido K, Sato F. Structure, function, and  
783           evolution of the PsbP protein family in higher plants. Vol. 98, Photosynthesis  
784           Research. 2008. p. 427–37.
- 785   51.   Harris EH. The *Chlamydomonas* Sourcebook Volume1: Introduction to  
786           *Chlamydomonas* and Its Laboratory Use. Journal of Chemical Information and  
787           Modeling. 2013.
- 788   52.   Kindle KL. High-frequency nuclear transformation of *Chlamydomonas*

789            *reinhardtii*. Methods Enzymol. 1998;297:27–38.

790

Table 1. GreenCut2 proteins within genes affected in ARC.

| Gene ID       | Gene name | Description                                                          | Comments       |
|---------------|-----------|----------------------------------------------------------------------|----------------|
| Cre01.g000850 | CPLD38    | Required for cyt b6f accumulation                                    |                |
| Cre01.g009650 | BUG25     | Basal body protein and putative AP2 domain transcription factor      |                |
| Cre01.g013801 |           | Tocopherol cyclase                                                   |                |
| Cre01.g016500 |           | Dihydrolipoamide dehydrogenase                                       | Not in Table 2 |
| Cre01.g016514 | DLD2      | Dihydrolipoamide dehydrogenase                                       |                |
| Cre01.g027150 |           | DEAD/DEAH-box helicase                                               |                |
| Cre01.g033763 |           | D-Amino acid aminotransferase-like PLP-dependent enzymes superfamily |                |
| Cre01.g033832 |           | DEAD-box ATP-dependent RNA helicase 39                               |                |
| Cre01.g043350 | CAO1      | Chlorophyllide a oxygenase                                           |                |
| Cre01.g049000 |           | Pterin dehydratase                                                   |                |
| Cre01.g049600 | CGLD22    | Expressed protein similar to ATP synthase I                          |                |
| Cre02.g084350 | CGLD1     | Predicted protein                                                    |                |
| Cre02.g084500 |           | Zinc finger MYND domain containing protein 10                        |                |
| Cre02.g084550 | NAT10     | Acyl-CoA N-acyltransferase-like protein                              | Not in Table 2 |
| Cre02.g086550 | CGL122    | 23S rRNA (adenine2503-C2)-methyltransferase                          |                |
| Cre02.g105450 | CGL141    | F7O18.3 PROTEIN                                                      |                |
| Cre02.g114750 | CDPK5     | MAP kinase activated protein kinase 5                                | Not in Table 2 |
| Cre02.g120100 | RBCS1     | RubisCO small subunit 1, chloroplast precursor                       |                |
| Cre02.g120150 | RBCS2     | RubisCO small subunit 2                                              |                |
| Cre03.g158900 | DLA2      | Dihydrolipoamide acetyltransferase                                   |                |
| Cre03.g160300 | RAM1      | Stress associated endoplasmic reticulum protein SERP1/RAMP4          | Not in Table 2 |
| Cre03.g173350 | ANK22     | Predicted protein with ankyrin repeats                               | Not in Table 2 |
| Cre03.g182551 | PCY1      | Pre-apoplastocyanin                                                  |                |
| Cre03.g182600 | CPL1      | Histone deacetylation protein Rxt3                                   |                |
| Cre03.g184550 | CPLD28    | LPA3, Predicted protein                                              |                |
| Cre03.g185200 |           | Metallophosphoesterase/metallo-dependent phosphatase                 |                |
| Cre05.g246800 | GUN4      | Tetrapyrrole-binding protein                                         |                |
| Cre05.g243800 | CPLD45    | PSB27                                                                |                |
| Cre05.g242400 | PGR5      | Proton Gradient Regulation 5, Chloroplastic                          |                |
| Cre05.g242000 | CHLD      | Magnesium chelatase subunit D                                        |                |
| Cre05.g238332 | PSAD      | Photosystem I reaction center subunit II                             |                |
| Cre06.g278212 | CGL46     | Predicted protein                                                    |                |
| Cre06.g280650 | CGL59     | Predicted protein                                                    |                |
| Cre07.g315150 | RBD1      | Rubredoxin                                                           |                |
| Cre07.g318200 | CGLD34    | ET and MYND domain-containing protein DDB                            |                |

|               |        |                                                                                                                     |                |
|---------------|--------|---------------------------------------------------------------------------------------------------------------------|----------------|
| Cre08.g362900 | PSBP4  | Luminal PsbP-like protein                                                                                           |                |
| Cre08.g372000 | CGLD11 | Predicted protein                                                                                                   |                |
| Cre08.g382300 | CCB4   | CGLD23 protein                                                                                                      |                |
| Cre09.g387000 | CGL34  | Predicted protein                                                                                                   | Not in Table 2 |
| Cre09.g394325 | ELI3   | Early light-inducible protein                                                                                       |                |
| Cre09.g411200 | TEF5   | Rieske [2Fe-2S] domain containing protein                                                                           | Not in Table 2 |
| Cre10.g420350 | PSAE   | Photosystem I 8.1 kDa reaction center subunit IV                                                                    |                |
| Cre10.g435850 | CPLD24 | Predicted protein                                                                                                   | Not in Table 2 |
| Cre10.g440450 | PSB28  | Photosystem II subunit 28                                                                                           |                |
| Cre10.g445100 | CGL50  | Predicted protein                                                                                                   |                |
| Cre10.g466500 | CPL12  | Glyoxylase family protein (yaeR)<br>Rieske iron-sulfur subunit of the cytochrome b6f complex, chloroplast precursor |                |
| Cre11.g467689 | PETC   |                                                                                                                     |                |
| Cre11.g467754 |        | Solute carrier protein, UAA transporter family                                                                      | Not in Table 2 |
| Cre11.g467700 | UPD1   | Uroporphyrinogen-III decarboxylase                                                                                  |                |
| Cre11.g468750 | CPLD48 | Predicted protein                                                                                                   |                |
| Cre11.g469450 | CGL124 | Adhesion regulating molecule 110kDa cell membrane glycoprotein                                                      |                |
| Cre12.g494000 | CGL82  | Predicted protein                                                                                                   |                |
| Cre12.g510050 | CTH1   | Copper target 1 protein                                                                                             | Not in Table 2 |
| Cre12.g509050 | PSBP3  | OEE2-like protein of thylakoid lumen                                                                                |                |
| Cre12.g517700 |        | Short-chain dehydrogenase/reductase, probably chlorophyll b reductase                                               |                |
| Cre12.g524300 | CGL71  | Predicted protein                                                                                                   |                |
| Cre12.g524350 | HUS1   | DNA damage checkpoint protein                                                                                       | Not in Table 2 |
| Cre12.g554800 | PRK1   | Phosphoribulokinase                                                                                                 |                |
| Cre13.g562475 |        | ER lumen protein retaining receptor family protein-related                                                          | Not in Table 2 |
| Cre13.g563150 | CGLD8  | Predicted protein                                                                                                   |                |
| Cre13.g575000 | CCS1   | Protein required for cytochrome c synthesis/biogenesis                                                              |                |
| Cre13.g577850 |        | Peptidyl-prolyl cis-trans isomerase, FKBP-type                                                                      | Not in Table 2 |
| Cre13.g578650 |        | Similar to complex I intermediate-associated protein 30                                                             | Not in Table 2 |
| Cre13.g579550 | CGL27  | Predicted protein                                                                                                   | Not in Table 2 |
| Cre14.g618050 | PLP3   | Plastid lipid associated protein                                                                                    | Not in Table 2 |
| Cre14.g624201 |        | Thioredoxin-like protein CDSP32, chloroplastic                                                                      | Not in Table 2 |
| Cre16.g660000 | CPLD63 | GDT1-like protein 2, chloroplastic                                                                                  | Not in Table 2 |

|               |        |                                                                             |                |
|---------------|--------|-----------------------------------------------------------------------------|----------------|
| Cre16.g665250 | APE1   | Thylakoid associated protein, Acclimation of Photosynthesis to Environment1 |                |
| Cre16.g666050 | CPLD49 | (Saccharopine) Dehydrogenase                                                |                |
| Cre16.g687450 | CPLD54 | K(+) Efflux Antiporter 3, chloroplastic (KEA3)                              | Not in Table 2 |
| Cre16.g675100 | CPLD53 | Zinc finger protein Constans-related                                        |                |
| Cre16.g674950 | POD2   | Prolycopene isomerase / CRTISO                                              |                |
| Cre17.g702150 | HCF164 | Thioredoxin-like protin HCF164, chloroplastic                               |                |
| Cre17.g702500 | TAB2   | PsaB RNA binding protein                                                    |                |
| Cre17.g710800 | NFU3   | Iron-sulfur cluster assembly protein                                        |                |
| Cre17.g717350 | TRI1   | tRNA dimethylallyltransferase / tRNA prenyltransferase                      | Not in Table 2 |
| Cre17.g717400 | TRIT1  | tRNA dimethylallyltransferase (miaA, TRIT1)                                 |                |
| Cre17.g731100 | CPL14  | DUF2358                                                                     |                |



Table 2. Higher confidence photosynthesis candidate genes.

| Cre ID        | Gene name    | Description                                                                            | Subcellular localization <sup>1</sup> | Green Cut2 <sup>2</sup> | Other mutant libraries <sup>3</sup> | Multiple candidates <sup>4</sup> |
|---------------|--------------|----------------------------------------------------------------------------------------|---------------------------------------|-------------------------|-------------------------------------|----------------------------------|
| Cre01.g000850 | CPLD38       | DUF3007                                                                                | C                                     | G                       |                                     |                                  |
| Cre01.g013801 |              | Tocopherol cyclase                                                                     | C                                     | G                       |                                     |                                  |
| Cre01.g016514 | DLD2         | Dihydrolipoyl dehydrogenase/Lipoyl dehydrogenase                                       | C                                     | G                       |                                     |                                  |
| Cre01.g027150 | CPLD40, HEL5 | DEAD/DEAH-box helicase                                                                 | C                                     | G                       | Cr                                  |                                  |
| Cre01.g033763 |              | D-Aminoacid aminotransferase-like PLP-dependent enzymes superfamily protein            | C                                     | G                       |                                     |                                  |
| Cre01.g033832 |              | DEAD-box ATP-dependent RNA helicase 39                                                 | C                                     | G                       |                                     |                                  |
| Cre01.g043350 | CAO1         | Chlorophyllide a oxygenase                                                             | C                                     | G                       |                                     |                                  |
| Cre01.g049000 | CGL31,PTD1   | Pterin dehydratase                                                                     | C                                     | G                       | Zm                                  |                                  |
| Cre01.g049600 | CGLD22       | Expressed protein similar to ATP synthase I                                            | C                                     | G                       |                                     |                                  |
| Cre02.g086550 | CGL122       | 23S rRNA (adenine2503-C2)-methyltransferase (rlmN)                                     | C                                     | G                       |                                     |                                  |
| Cre02.g120100 | RBCS1        | Ribulose-1,5-bisphosphate carboxylase/oxygenase small subunit 1, chloroplast precursor | C                                     | G                       |                                     |                                  |
| Cre02.g120150 | RBCS2        | Ribulose-1,5-bisphosphate carboxylase/oxygenase small subunit 2                        | C                                     | G                       |                                     |                                  |
| Cre03.g158900 | DLA2         | Dihydrolipoamide acetyltransferase                                                     | C                                     | G                       |                                     |                                  |
| Cre03.g182551 | PCY1         | Pre-apoplastocyanin                                                                    | C                                     | G                       | Cr                                  |                                  |
| Cre03.g185200 | CPL3, MPA6   | Metallophosphoesterase/metallo-dependent phosphatase                                   | C                                     | G                       | Cr                                  | M                                |
| Cre05.g238332 | PSAD         | Photosystem I reaction center subunit II, 20 kDa                                       | C                                     | G                       | Cr                                  |                                  |
| Cre05.g242000 | CHLD         | Magnesium chelatase subunit D                                                          | C                                     | G                       | Cr                                  |                                  |
| Cre05.g242400 |              | PGR5                                                                                   | C                                     | G                       |                                     |                                  |
| Cre05.g243800 | CPLD45       | Predicted protein                                                                      | C                                     | G                       | Cr                                  |                                  |

|               |              |                                                                                                  |   |   |       |   |
|---------------|--------------|--------------------------------------------------------------------------------------------------|---|---|-------|---|
| Cre05.g246800 | GUN4         | Tetrapyrrole-binding protein                                                                     | C | G | Zm    |   |
| Cre06.g278212 | CGL46        | Predicted protein                                                                                | C | G |       |   |
| Cre06.g280650 | CGL59        | Predicted protein                                                                                | C | G | Cr,Zm |   |
| Cre07.g315150 | RBD1         | Rubredoxin                                                                                       | C | G |       | M |
| Cre08.g362900 | PSBP4        | Lumenal PsbP-like protein                                                                        | C | G | Zm    |   |
| Cre08.g372000 | CGLD11       | Predicted protein                                                                                | C | G |       |   |
| Cre08.g382300 | CCB4         | CGLD23 protein, required for Cyt b6 assembly                                                     | C | G | Zm    |   |
| Cre09.g394325 | ELI3         | Early light-inducible protein                                                                    | C | G |       |   |
| Cre09.g411200 |              | Rieske domain-containing protein                                                                 | C | G | At    | M |
| Cre10.g420350 | PSAE         | Photosystem I 8.1 kDa reaction center subunit IV                                                 | C | G | Cr    |   |
| Cre10.g440450 | PSB28        | Photosystem II subunit 28                                                                        | C | G |       |   |
| Cre10.g445100 | CGL50        | Predicted protein                                                                                | C | G |       |   |
| Cre10.g466500 | CPL12        | Glyoxylase family protein (yaeR)                                                                 | C | G | Cr    |   |
| Cre11.g467689 | PETC         | Rieske iron-sulfur subunit of the Cytochrome b6f complex, chloroplast precursor                  | C | G | Cr    |   |
| Cre11.g467700 | UPD1         | Uroporphyrinogen-III decarboxylase                                                               | C | G |       | M |
| Cre11.g468750 | CPLD48, LPA3 | Predicted protein                                                                                | C | G |       |   |
| Cre12.g509050 | PSBP3        | OEE2-like protein of thylakoid lumen                                                             | C | G |       |   |
| Cre12.g524300 | CGL71        | Tricopeptide repeat, Protein O-GlcNac transferase                                                | C | G | Cr,Zm |   |
| Cre12.g554800 | PRK1         | Phosphoribulokinase                                                                              | C | G | Cr    | M |
| Cre13.g563150 | CGLD8        | Predicted protein                                                                                | C | G | Zm    |   |
| Cre16.g665250 | APE1         | Thylakoid associated protein required for photosynthetic acclimation to variable light intensity | C | G |       |   |
| Cre16.g666050 | CPLD49, SCD1 | Saccharopine dehydrogenase                                                                       | C | G | Cr    | M |
| Cre16.g675100 | CrCO         | Zinc finger protein CONSTANS-related                                                             | C | G |       |   |
| Cre17.g702150 | TRX20,HCF164 | Thioredoxin-like protein HCF164, chloroplastic                                                   | C | G | Cr    |   |
| Cre17.g702500 | TAB2         | DUF1092, PsaB RNA binding protein                                                                | C | G | Zm    |   |
| Cre17.g710800 | NFU3         | Iron-sulfur cluster assembly protein                                                             | C | G |       |   |
| Cre17.g731100 | CPL14        | Uncharacterized conserved protein                                                                | C | G |       |   |
| Cre01.g018600 | BAP31        | B-cell receptor-associated protein 31-like                                                       | C |   |       |   |

|               |             |                                                                                     |   |    |   |
|---------------|-------------|-------------------------------------------------------------------------------------|---|----|---|
| Cre01.g034600 |             | WD-40 domain                                                                        | C |    |   |
| Cre01.g049350 |             | Zinc metalloprotease EGY2, chloroplastic-related                                    | C |    | M |
| Cre01.g050500 | PPR1        | Pentatrichoepptide repeat protein                                                   | C | Cr | M |
| Cre02.g076600 |             | Peptidyl-tRNA hydrolase, PTH1 family                                                | C | Zm |   |
| Cre02.g087900 |             | Mitogen-activated protein kinase kinase kinase/MLTK                                 | C |    |   |
| Cre02.g105650 |             |                                                                                     | C | Cr |   |
| Cre02.g120250 | CDPK7, STT7 | Calcium/calmodulin-dependent protein kinase                                         | C |    |   |
| Cre02.g142146 |             | Divinyl chlorophyllide a 8-vinyl-reductase/[4-vinyl]chlorophyllide a reductase      | C | Zm |   |
| Cre03.g145347 |             |                                                                                     | C |    |   |
| Cre03.g149450 |             | Ion channel pollux-related                                                          | C |    |   |
| Cre03.g154550 | PCR1        | Pyrroline-5-carboxylate reductase                                                   | C |    |   |
| Cre03.g155250 |             |                                                                                     | C |    |   |
| Cre03.g159851 |             | I-kappa-b-like protein IKBL                                                         | C |    |   |
| Cre03.g172500 | PTO2/PTOX2  | Plastid terminal oxidase                                                            | C |    |   |
| Cre03.g185550 | SBP1        | Sedoheptulose-1,7-bisphosphatase                                                    | C | Cr |   |
| Cre03.g194200 | PDH2        | Pyruvate dehydrogenase E1 beta subunit                                              | C |    |   |
| Cre03.g206369 |             | Tyrosine kinase specific for activated (GTP-bound)//Serine/Threonine protein kinase | C | Cr |   |
| Cre03.g207153 |             |                                                                                     | C |    |   |
| Cre03.g211633 |             | Similar to Flagellar Associated Protein FAP165                                      | C |    | M |
| Cre03.g213201 |             |                                                                                     | C |    |   |
| Cre05.g232200 | NDA3        | Mitochondrial NADH dehydrogenase                                                    | C |    |   |
| Cre05.g238322 |             | Tryptophan--tRNA ligase/Tryptophanyl-tRNA synthetase                                | C |    |   |
| Cre05.g238500 |             | 23S rRNA (adenine2503-C2)-methyltransferase                                         | C |    |   |
| Cre05.g241900 |             |                                                                                     | C |    |   |
| Cre06.g259100 |             |                                                                                     | C | Cr |   |
| Cre06.g262650 | OPR22, TAA1 | RAP domain (RAP)                                                                    | C |    |   |
| Cre06.g271200 |             | NADH oxidase (H2O2-forming)                                                         | C |    |   |
| Cre06.g280150 | PSBP9       | PsbP-like protein                                                                   | C |    |   |

|               |             |                                                                                           |   |    |   |
|---------------|-------------|-------------------------------------------------------------------------------------------|---|----|---|
| Cre06.g281800 |             | Domain of unknown function (DUF1995)                                                      | C | Cr |   |
| Cre06.g284100 | RHP1        | Rh protein, CO2-responsive                                                                | C |    |   |
| Cre06.g284150 | RHP2        | Rh protein                                                                                | C |    |   |
| Cre07.g331450 | NAT19       |                                                                                           | C |    |   |
| Cre07.g344950 | LHCA9       | Light-harvesting protein of photosystem I                                                 | C |    |   |
| Cre07.g349800 |             |                                                                                           | C |    |   |
| Cre07.g356350 | DXS1        | 1-Deoxy-D-xylulose 5-phosphate synthase, chloroplast precursor                            | C |    |   |
| Cre08.g358250 | MCA1        | PPR repeat/Maturation/stability factor for petA mRNA                                      | C | Zm |   |
| Cre08.g358350 | TDA1, OPR34 | FAST Leu-rich domain-containing                                                           | C | Cr | M |
| Cre08.g361250 |             | Protein O-GlcNAc transferase/OGTase (DUF563)                                              | C |    |   |
| Cre09.g388356 | TBC2        | Translation factor for chloroplast psbC mRNA/Translation factor for chloroplast PsbC mRNA | C | Cr | M |
| Cre09.g390060 |             |                                                                                           | C | Cr |   |
| Cre09.g392729 |             | Methionyl-tRNA formyltransferase/transformylase                                           | C |    |   |
| Cre09.g394150 | RAA1        | FAST kinase-like protein, subdomain 1                                                     | C | Cr |   |
| Cre09.g398919 |             |                                                                                           | C |    |   |
| Cre10.g417750 |             | Neuropathy target esterase/Swiss cheese D.melanogaster                                    | C |    | M |
| Cre10.g419900 |             |                                                                                           | C |    |   |
| Cre10.g421150 |             | Glycosyltransferase 14 Family Member                                                      | C |    |   |
| Cre10.g431950 |             | Dual-specificity kinase                                                                   | C |    |   |
| Cre10.g448950 |             | Endonuclease/Exonuclease/Phosphatase family                                               | C | Cr |   |
| Cre10.g452800 | LCIB        | Low-CO2-inducible protein                                                                 | C | Cr |   |
| Cre11.g467712 |             | Structural maintenance of chromosomes SMC family member                                   | C | Cr |   |
| Cre11.g476100 |             |                                                                                           | C | Cr | M |
| Cre11.g477625 | (CHLH2)     | Magnesium chelatase subunit H                                                             | C | Zm |   |
| Cre12.g486750 |             |                                                                                           | C |    |   |
| Cre12.g487500 | CGL61, NYE1 | Stay green 1 protein, predicted protein                                                   | C |    |   |
| Cre12.g494550 | RNP10       | RNA binding protein                                                                       | C |    | M |
| Cre12.g496250 |             |                                                                                           | C |    |   |

|               |              |                                                                                                  |   |    |   |
|---------------|--------------|--------------------------------------------------------------------------------------------------|---|----|---|
| Cre12.g508850 | GST8         | Glutathione S-transferase, GST, superfamily, GST domain containing                               | C |    |   |
| Cre12.g510650 | FBP1         | Fructose-1,6-bisphosphatase                                                                      | C | Cr |   |
| Cre12.g510750 |              |                                                                                                  | C |    |   |
| Cre12.g517681 |              |                                                                                                  | C | Cr |   |
| Cre12.g522000 |              |                                                                                                  | C |    | M |
| Cre12.g524250 |              |                                                                                                  | C | Cr |   |
| Cre12.g531050 | RAA3         | PsaA mRNA maturation factor 3                                                                    | C | Cr |   |
| Cre12.g538650 | HEM4         | Uroporphyrinogen-III synthase                                                                    | C |    |   |
| Cre12.g549500 |              | Pyrimidodiazepine synthase                                                                       | C |    |   |
| Cre13.g569700 |              |                                                                                                  | C | Cr | M |
| Cre13.g573000 |              | Ribulose-1,5-bisphosphate carboxylase/oxygenase small subunit N-methyltransferase I-related      | C |    |   |
| Cre13.g574200 | PAP2         | Poly(A) polymerase/Topoisomerase related protein                                                 | C |    |   |
| Cre13.g578750 | TBA1         | PsbA translation factor                                                                          | C |    |   |
| Cre13.g580650 |              | Serine/Threonine-protein phosphatase 2A activator (PPP2R4, PTPA)                                 | C |    |   |
| Cre13.g580850 |              | Chloroplast 50S ribosomal protein L22-related                                                    | C |    |   |
| Cre13.g584950 |              |                                                                                                  | C |    |   |
| Cre14.g621650 |              | Malonyl-CoA acyl carrier protein transacylase (fabD)                                             | C |    |   |
| Cre14.g624350 | VTE6         | MPBQ/MSBQ methyltransferase                                                                      | C |    |   |
| Cre16.g658950 |              |                                                                                                  | C | Cr |   |
| Cre16.g662150 | CCB1, CPLD51 | CPLD51 protein, required for Cyt b6 assembly                                                     | C |    | M |
| Cre16.g665800 | SSS4         | Soluble starch synthase                                                                          | C |    |   |
| Cre16.g670754 |              | Voltage and ligand gated potassium channel                                                       | C |    |   |
| Cre16.g677050 |              | Adenylate and guanylate cyclase catalytic domain//Bacterial extracellular solute-binding protein | C |    |   |
| Cre16.g684250 |              |                                                                                                  | C |    |   |
| Cre16.g684300 |              | 3-Hydroxyisobutyrate dehydrogenase-related                                                       | C | Zm |   |
| Cre16.g684900 |              |                                                                                                  | C |    | M |
| Cre16.g686510 |              |                                                                                                  | C |    |   |
| Cre16.g687966 | FAP5         | Tetratricopeptide repeat, Flagellar associated protein                                           | C |    |   |

|               |              |                                                                                                                     |     |   |    |   |
|---------------|--------------|---------------------------------------------------------------------------------------------------------------------|-----|---|----|---|
| Cre16.g689150 | SQD3         | Sulfolipid synthase                                                                                                 | C   |   |    |   |
| Cre16.g692228 | MARS1        | Serine/Threonine protein kinase                                                                                     | C   |   | Cr |   |
| Cre17.g704000 |              | Polyvinyl-alcohol oxidase/PVA oxidase                                                                               | C   |   |    |   |
| Cre17.g719450 |              | Ca <sup>2+</sup> /calmodulin-dependent protein kinase, EF-Hand protein superfamily//Serine/threonine protein kinase | C   |   |    |   |
| Cre17.g724600 | PAO2         | Pheophorbide a oxygenase, Rieske iron-sulfur cluster protein                                                        | C   |   |    |   |
| Cre17.g724700 | PAO1         | Pheophorbide a oxygenase, Rieske iron-sulfur cluster protein                                                        | C   |   |    |   |
| Cre17.g734548 | PPD2         | Pyruvate phosphate dikinase, chloroplastic                                                                          | C   |   | Zm |   |
| Cre12.g509001 | RPK2         | Mitogen-activated protein kinase                                                                                    | n/a |   | Cr |   |
| Cre01.g009650 | BUG25        | Basal body protein and putative AP2 domain transcription factor                                                     | O   | G |    | M |
| Cre02.g084350 | CGLD1        | Predicted protein (GDT1 like protein 1, chloroplastic)                                                              | O   | G |    |   |
| Cre03.g184550 | CPLD28, LPA3 | Predicted protein                                                                                                   | O   | G |    |   |
| Cre07.g318200 | CGLD34       | SET and MYND domain containing protein DDB                                                                          | O   | G |    |   |
| Cre11.g469450 | CGL124       | Adhesion regulating molecule 1 110 kDa cell membrane glycoprotein                                                   | O   | G |    |   |
| Cre12.g494000 | CGL82        | Predicted protein/BRCA1-associated protein                                                                          | O   | G |    |   |
| Cre12.g517700 | NYC1, SDR21  | Short-chain dehydrogenase/reductase, probably chlorophyll b reductase                                               | O   | G |    |   |
| Cre13.g575000 | CCS1         | Protein required for Cytochrome c synthesis/biogenesis, chloroplastic                                               | O   | G | Zm |   |
| Cre17.g717400 | miaA, TRIT1  | tRNA dimethylallyltransferase                                                                                       | O   | G |    | M |
| Cre01.g016570 |              | Mitogen-activated protein kinase kinase kinase 19                                                                   | O   |   |    |   |
| Cre01.g019700 | PAP7         | Non-canonical poly(A) polymerase                                                                                    | O   |   |    |   |
| Cre01.g030700 | PTK14        | Protein tyrosine kinase                                                                                             | O   |   |    |   |
| Cre01.g032450 | GLG1         | Golgi apparatus protein 1                                                                                           | O   |   |    |   |
| Cre01.g033450 |              | Sphingomyelin phosphodiesterase 2                                                                                   | O   |   |    |   |
| Cre01.g040150 |              | WNK lysine deficient protein kinase (WNK, PRKWNK)                                                                   | O   |   |    |   |
| Cre01.g043850 |              | Serine/Threonine protein kinase                                                                                     | O   |   |    |   |
| Cre01.g044850 |              | Sacsin (SACS)                                                                                                       | O   |   |    |   |
| Cre01.g053900 | NGLY1, PNG1  | Peptide-N4-(N-acetyl-beta-glucosaminyl)asparagine amidase                                                           | O   |   |    |   |
| Cre02.g080700 | BIP1         | Endoplasmic reticulum associated HSP70 protein                                                                      | O   |   |    |   |
| Cre02.g084250 | PPP7         | Protein phosphatase 1K, mitochondrial                                                                               | O   |   |    |   |

|               |        |                                                                              |   |   |
|---------------|--------|------------------------------------------------------------------------------|---|---|
| Cre02.g088650 |        | Phosphatidylinositol N-acetylglucosaminyltransferase/glucosaminyltransferase | O |   |
| Cre02.g099601 |        | Androgen induced inhibitor of proliferation AS3/PDS5-related                 | O |   |
| Cre02.g099850 | PDC2   | Pyruvate dehydrogenase, E1 component, alpha subunit                          | O |   |
| Cre02.g100300 |        | Phosphatidylinositol 3-kinase-related protein kinase                         | O |   |
| Cre02.g106250 | LAL2   | La-like RNA-binding protein                                                  | O |   |
| Cre02.g110500 |        |                                                                              | O |   |
| Cre02.g142750 |        |                                                                              | O |   |
| Cre02.g143400 |        | 3',5'-cyclic-nucleotide phosphodiesterase                                    | O |   |
| Cre03.g145387 | FAP239 | Flagellar associated protein                                                 | O |   |
| Cre03.g145987 |        |                                                                              | O |   |
| Cre03.g156150 |        | ATP-dependent RNA helicase DDX10/DBP4                                        | O |   |
| Cre03.g160250 |        |                                                                              | O |   |
| Cre03.g160400 | SAC1   | Sulfur acclimation 1 protein, sodium/sulfate co-transporter                  | O | M |
| Cre03.g164900 |        | Serine/Threonine protein kinase OSR1                                         | O |   |
| Cre03.g168100 |        |                                                                              | O |   |
| Cre03.g173600 |        | Ubiquitin and ubiquitin-like proteins                                        | O |   |
| Cre03.g175700 |        | CobW-related                                                                 | O |   |
| Cre03.g179650 |        | BTB/POZ domain (BTB)                                                         | O |   |
| Cre03.g182550 | PNO3   | Ferredoxin-NAD(+) reductase                                                  | O |   |
| Cre03.g182900 |        | PNAS-related                                                                 | O |   |
| Cre03.g197450 |        | Winged helix dna-binding domain-containing protein                           | O |   |
| Cre03.g199250 | CYG51  | Adenylate/guanylate cyclase                                                  | O |   |
| Cre03.g207400 |        | von Willebrand factor type A domain                                          | O |   |
| Cre03.g209505 |        | Serine/Threonine-protein kinase SRK2                                         | O |   |
| Cre03.g210961 |        | Phosphatidylinositol transfer protein PDR16-related                          | O |   |
| Cre04.g212401 |        | Baculoviral IAP repeat-containing protein 6 (apollon) (BIRC6, BRUCE)         | O |   |
| Cre05.g232150 | GDH2   | Glutamate dehydrogenase                                                      | O |   |
| Cre05.g245550 | PIK1   | Phosphatidylinositol 4-kinase                                                | O |   |

|               |        |                                                     |   |   |
|---------------|--------|-----------------------------------------------------|---|---|
| Cre06.g264100 |        |                                                     | O |   |
| Cre06.g268750 | MME1   | Malate dehydrogenase, decarboxylating               | O |   |
| Cre06.g278094 | ELG14  | Exostosin-like glycosyltransferase                  | O |   |
| Cre06.g280050 | XRN1   | Single-stranded RNA 5'->3' exonuclease              | O |   |
| Cre06.g281250 | CFA1   | Cyclopropane fatty acid synthase                    | O |   |
| Cre06.g282300 |        |                                                     | O | M |
| Cre06.g289600 |        |                                                     | O |   |
| Cre06.g300250 | TTL10  | Tubulin polyglutamylase TTL2                        | O |   |
| Cre06.g302305 |        |                                                     | O |   |
| Cre06.g308100 |        | Enoyl-CoA hydratase 2/ECH2                          | O |   |
| Cre06.g308150 | DNJ23  | DnaJ-like protein                                   | O |   |
| Cre07.g336150 |        |                                                     | O |   |
| Cre07.g342920 |        | Xaa-Pro dipeptidase/X-Pro dipeptidase               | O |   |
| Cre07.g348550 | TGL13  | Protein T08B1.4, Isoform B-related (lipase related) | O |   |
| Cre07.g355750 |        | F-box and WD40 domain protein                       | O |   |
| Cre07.g356450 |        | Leucine-rich repeat-containing protein              | O |   |
| Cre07.g357876 |        |                                                     | O |   |
| Cre08.g359100 |        | tRNA (guanine(10)-N(2))-methyltransferase           | O |   |
| Cre08.g365200 |        |                                                     | O |   |
| Cre08.g365550 |        |                                                     | O |   |
| Cre08.g370550 |        | D-2-Hydroxyglutarate dehydrogenase                  | O |   |
| Cre08.g375000 |        | Actin-fragmin kinase, catalytic                     | O |   |
| Cre08.g382515 |        | WD repeat-containing protein 26                     | O |   |
| Cre08.g385300 |        | ET and MYND domain-containing protein DDB           | O |   |
| Cre09.g386450 |        |                                                     | O |   |
| Cre09.g391356 |        | Mitogen-activated protein kinase kinase kinase/MLTK | O |   |
| Cre09.g393136 |        | Clathrin assembly protein                           | O |   |
| Cre09.g397956 | FAP201 | Flagellar associated protein (Exotosin family)      | O |   |
| Cre09.g399650 |        |                                                     | O |   |



|               |        |                                                                                |   |       |   |
|---------------|--------|--------------------------------------------------------------------------------|---|-------|---|
| Cre09.g410000 |        | DC12-Related                                                                   | O |       |   |
| Cre10.g419250 |        |                                                                                | O |       |   |
| Cre10.g420537 |        | Sphingomyelin phosphodiesterase 2                                              | O |       |   |
| Cre10.g427950 |        | Leucine-rich repeat-containing protein                                         | O |       |   |
| Cre10.g429400 | MCG1   | FAST Leu-rich domain-containing, stabilize petG mRNA                           | O | Cr    |   |
| Cre10.g429601 |        | Cell death-related nuclease 2                                                  | O |       |   |
| Cre10.g433350 |        | Squamosa promoter-binding-like protein 10-related                              | O |       |   |
| Cre10.g433900 |        | E3 ubiquitin-protein ligase HUWE1 (HUWE1, MULE, ARF-BP1)                       | O |       |   |
| Cre10.g448051 |        | Sec14p-like phosphatidylinositol transfer family protein                       | O |       | M |
| Cre10.g457900 |        |                                                                                | O |       |   |
| Cre11.g467644 | CLPB1  | ClpB chaperone, Hsp100 family ClpB chaperone, Hsp100 family                    | O |       | M |
| Cre11.g467690 |        | Glutathione transferase/S-(hydroxyalkyl)glutathione lyase                      | O |       |   |
| Cre12.g483650 |        | Serine/Threonine-protein kinase STN7, chloroplastic                            | O |       | M |
| Cre12.g494350 |        | Endomembrane family protein 70                                                 | O |       |   |
| Cre12.g499500 | SAC3   | Sulfur acclimation protein, Snf1-like Ser/Thr protein kinase                   | O |       | M |
| Cre12.g502000 | FAP253 | Flagellar associated protein                                                   | O |       |   |
| Cre12.g510034 |        | Tetratricopeptide repeat protein 33, Osmosis responsive factor                 | O |       |   |
| Cre12.g511400 |        | Cyclin-related protein with PPR domain                                         | O | Zm,At | M |
| Cre12.g511650 |        | Auxilin/cyclin G-associated kinase-related                                     | O |       |   |
| Cre12.g524500 | RMT2   | Rubisco small subunit N-methyltransferase                                      | O | Cr    |   |
| Cre12.g524700 |        | Pyrimidine and pyridine-specific 5'-nucleotidase (SDT1)                        | O | Zm    |   |
| Cre12.g527600 |        | Polyglutamine-binding protein 1 (PQBP1, NPW38)                                 | O |       |   |
| Cre12.g528250 |        | WASP-interacting protein VRP1/WIP, contains WH2 domain                         | O |       |   |
| Cre12.g543100 |        | tRNA (adenine-N(1)-)-methyltransferase non-catalytic subunit (TRM6, GCD10)     | O |       |   |
| Cre12.g549050 | STR1   | Strictosidine synthase                                                         | O |       |   |
| Cre12.g559050 |        | BCDNA, fatty acid metabolism, transport                                        | O |       |   |
| Cre13.g579450 | CST1   | Chlamydomonas-specific membrane transporter of unknown function                | O |       |   |
| Cre13.g583650 |        | Non-specific Serine/Threonine protein kinase/Threonine-specific protein kinase | O |       |   |

|               |       |                                                                                                            |   |    |   |
|---------------|-------|------------------------------------------------------------------------------------------------------------|---|----|---|
| Cre13.g584350 |       |                                                                                                            | O |    |   |
| Cre13.g586750 |       | Transportin 3 and Importin 13                                                                              | O | Cr | M |
| Cre13.g588650 |       |                                                                                                            | O |    |   |
| Cre13.g605650 |       | Betaine aldehyde dehydrogenase/oxidase                                                                     | O |    |   |
| Cre13.g607000 |       | Cytosol nonspecific dipeptidase/Prolyglycine dipeptidase                                                   | O |    |   |
| Cre14.g608652 |       |                                                                                                            | O |    |   |
| Cre15.g635450 |       |                                                                                                            | O |    |   |
| Cre16.g656000 |       | Sphingomyelin phosphodiesterase 2                                                                          | O |    |   |
| Cre16.g656200 |       | IQ calmodulin-binding motif (IQ)//Tetratricopeptide repeat (TPR_12)                                        | O |    |   |
| Cre16.g657979 |       | Kinesin Family Member C2/C3                                                                                | O |    |   |
| Cre16.g661250 |       | Thioredoxin peroxidase                                                                                     | O |    |   |
| Cre16.g663050 |       | Guanylate-binding family protein                                                                           | O |    |   |
| Cre16.g663600 |       | MFS transporter, ACS family, solute carrier family 17 (sodium-dependent inorganic phosphate cotransporter) | O |    |   |
| Cre16.g665400 |       | Small nuclear ribonucleoprotein SmD1                                                                       | O |    |   |
| Cre16.g666150 | ODA1  | Flagellar outer dynein arm-docking complex protein 2                                                       | O |    |   |
| Cre16.g668700 |       |                                                                                                            | O | Cr | M |
| Cre16.g678808 |       | U4/U6 small nuclear ribonucleoprotein Prp4 (contains WD40 repeats)                                         | O |    |   |
| Cre16.g679950 | RFC3  | DNA replication factor C complex subunit 3                                                                 | O |    |   |
| Cre16.g682100 |       | Tropinone reductase I                                                                                      | O |    |   |
| Cre16.g687500 | ARP2  | Actin-related protein                                                                                      | O |    |   |
| Cre17.g704350 |       | Glyoxalase domain-containing protein 4                                                                     | O |    | M |
| Cre17.g711150 | FAD2  | omega-6 Fatty acid desaturase (delta-12 desaturase)                                                        | O |    |   |
| Cre17.g712850 | TRX23 | Thiol-disulfide isomerase and thioredoxin                                                                  | O | Cr | M |
| Cre17.g721350 | GST13 | Glutathione S-transferase                                                                                  | O |    |   |
| Cre17.g721950 |       | E3 UBIQUITIN-PROTEIN LIGASE ARI2-RELATED                                                                   | O |    |   |
| Cre17.g722300 |       |                                                                                                            | O |    |   |
| Cre17.g725750 | SSA2  | 60 kDa SS-A/Ro ribonucleoprotein                                                                           | O |    |   |
| Cre17.g728800 | IDH1  | Isocitrate dehydrogenase, NAD-dependent                                                                    | O |    |   |

Cre17.g742400

PTK17

Protein tyrosine kinase

O

M

1 C, predicted to be chloroplast targeted by Predalgo or ChloroP; O, other; n/a, not analyzed.

2 G, GreenCut2.

3 Identified in other photosynthesis mutant library studies Chlamydomonas (Cr), Maize (Zm), Arabidopsis (At).

4 M, Multiple strong candidates in this mutant. See S4 Table for further detail.
